# Supplementary material for: In search of tris(trimethylsilylcyclopentadienyl) thorium
Source: Royal Society of Chemistry journal article supplement (doi:10.1039/c9dt03674a), 2019-01-01
Supplement: c9dt03674a1.pdf [file c9dt03674a1.pdf]

## Supporting Information

### In Search of Tris(Trimethylsilylcyclopentadienyl) Thorium

Justin C. Wedal, Samuel Bekoe, Joseph W. Ziller , Filipp Furche,\* and William J. Evans\*

Department of Chemistry, University of California, Irvine, California 92697, United States

Email: [wevans@uci.edu](mailto:wevans@uci.edu), [filipp.furche@uci.edu](mailto:filipp.furche@uci.edu)

\*To whom correspondence should be addressed

## Table of Contents

|                                                                                                                                    |            |
|------------------------------------------------------------------------------------------------------------------------------------|------------|
| <b>Experimental Details</b>                                                                                                        | <b>S3</b>  |
| <b><sup>1</sup>H NMR spectra for reaction of A with MeI</b>                                                                        | <b>S5</b>  |
| <b>Crystallographic Details for:</b>                                                                                               |            |
| <b>Cp'<sub>3</sub>ThBr</b>                                                                                                         | <b>S6</b>  |
| Figure S3: ORETP representation of Cp' <sub>3</sub> ThBr                                                                           | <b>S7</b>  |
| Table S1. Bond lengths [Å] and angles [°] for Cp' <sub>3</sub> ThBr                                                                | <b>S7</b>  |
| Table S2. Bond lengths [Å] and angles [°] for Cp' <sub>3</sub> ThBr                                                                | <b>S8</b>  |
| <b>Cp'<sub>3</sub>ThMe</b>                                                                                                         | <b>S15</b> |
| Figure S4. ORETP representation of Cp' <sub>3</sub> ThMe                                                                           | <b>S17</b> |
| Table S3. Bond lengths [Å] and angles [°] for Cp' <sub>3</sub> ThMe                                                                | <b>S17</b> |
| Table S4. Bond lengths [Å] and angles [°] for Cp' <sub>3</sub> ThMe                                                                | <b>S18</b> |
| <b>(Cp'<sub>3</sub>Th)<sub>2</sub>(μ-O)</b>                                                                                        | <b>S21</b> |
| Figure S5. ORETP representation of (Cp' <sub>3</sub> Th) <sub>2</sub> (μ-O)                                                        | <b>S22</b> |
| Table S5. Bond lengths [Å] and angles [°] for (Cp' <sub>3</sub> Th) <sub>2</sub> (μ-O)                                             | <b>S22</b> |
| Table S6. Bond lengths [Å] and angles [°] for (Cp' <sub>3</sub> Th) <sub>2</sub> (μ-O)                                             | <b>S23</b> |
| <b>Computational Details</b>                                                                                                       | <b>S27</b> |
| Figure S6. Calculated dz <sup>2</sup> -like HOMO of Cp' <sub>3</sub> Th                                                            | <b>S28</b> |
| Figure S7. d-f like HOMO of (Cp' <sub>3</sub> ThBr) <sup>1-</sup> and f-like HOMO of Cp' <sub>3</sub> ThBr                         | <b>S29</b> |
| Figure S8. Calculated UV-visible spectra of Cp' <sub>3</sub> Th, (Cp' <sub>3</sub> ThBr) <sup>1-</sup> , and Cp' <sub>3</sub> ThBr | <b>S29</b> |
| Table S7. Electronic excitation summary of Cp' <sub>3</sub> Th, (Cp' <sub>3</sub> ThBr) <sup>1-</sup> , and Cp' <sub>3</sub> ThBr  | <b>S30</b> |
| <b>Figure S9: X-band EPR spectrum of (C<sub>5</sub>Me<sub>4</sub>H)<sub>3</sub>Th in toluene at 77K</b>                            | <b>S32</b> |
| <b>Figure S10: Decomposition of A by monitoring absorbance at 496 nm in THF</b>                                                    | <b>S32</b> |

## Electrochemical Details

|                                                                                               |            |
|-----------------------------------------------------------------------------------------------|------------|
| <b>Figure S11:</b> Cyclic voltammogram of Cp' <sub>3</sub> ThCl with a scan rate of 200 mV/s  | <b>S33</b> |
| <b>Figure S12:</b> Cyclic voltammogram of Cp' <sub>3</sub> ThCl with a scan rate of 500 mV/s  | <b>S34</b> |
| <b>Figure S13:</b> Cyclic voltammogram of Cp' <sub>3</sub> ThCl with a scan rate of 1000 mV/s | <b>S34</b> |
| <b>References</b>                                                                             | <b>S35</b> |

## Experimental Details

**Synthesis of Cp'<sub>3</sub>ThCl from A and Me<sub>3</sub>SiCl.** Cp'<sub>3</sub>ThBr (51 mg, 0.070 mmol) in THF (1 mL) and KC<sub>8</sub> (11 mg, 0.081 mmol) were chilled in separate vials at -35 °C for two hours. The KC<sub>8</sub> was tapped into the colorless stirring solution of Cp'<sub>3</sub>ThBr to form the dark blue solution **A**. Me<sub>3</sub>SiCl (3 drops, excess) was added. No immediate color change occurred, so the solution was stirred for 40 min at which point the solution had become colorless. Black solids were removed via centrifugation and the colorless supernatant was dried under vacuum. Extraction into hexane and removal of solvent yielded white solids (36 mg). Cp'<sub>3</sub>ThCl and Cp'<sub>3</sub>ThH<sup>1</sup> were identified by <sup>1</sup>H NMR spectroscopy in an 8:1 ratio.

**Synthesis of Cp'<sub>3</sub>ThI from A and I<sub>2</sub>.** Following a similar procedure for the synthesis of Cp'<sub>3</sub>ThCl from **A**, Cp'<sub>3</sub>ThBr (48 mg, 0.066 mmol) and KC<sub>8</sub> (11 mg, 0.081 mmol) were combined to form the solution **A**. A solution of I<sub>2</sub> (18 mg, 0.071 mmol) in THF (1 mL) was added dropwise. The mixture immediately turned orange. After stirring for 5 min, the solution was dried and the solids were extracted into hexane. The solvent was removed under vacuum to yield as yellow solids (47 mg), Cp'<sub>3</sub>ThI and Cp'<sub>3</sub>ThBr were identified by <sup>1</sup>H NMR spectroscopy in a 10:1 ratio, along with a small amount of other unidentifiable peaks.

**Synthesis of Cp'<sub>3</sub>Th(C≡CPh) from A and HC≡CPh.** Following a similar procedure for the synthesis of Cp'<sub>3</sub>ThCl from A, Cp'<sub>3</sub>ThBr (50 mg, 0.069 mmol) and KC<sub>8</sub> (12 mg, 0.089 mmol) were combined to form solution A. HC≡CPh (1 drop) was added and the solution immediately became dark orange. After the solution was stirred for 5 min, volatiles were removed under vacuum to yield a dark oil. The oil was extracted into hexane to yield a green-brown solution. This solution was filtered and dried to yield brown oily solids. Cp'<sub>3</sub>Th(C≡CPh) was identified by <sup>1</sup>H NMR spectroscopy.

**Reaction of A and MeI.** Following a similar procedure for the synthesis of Cp'<sub>3</sub>ThCl from A, Cp'<sub>3</sub>ThBr (51 mg, 0.070 mmol) and KC<sub>8</sub> (11 mg, 0.081 mmol) were combined to form the solution A. MeI (1 drop) was added and the solution immediately turned colorless. After stirring for 5 min, the solution was dried and the solids were extracted into hexane. The solvent was removed under vacuum to yield white solids (44 mg). The mixture contained Cp'<sub>3</sub>ThMe and Cp'<sub>3</sub>ThI in an approximate 1 : 1.5 ratio as determined by <sup>1</sup>H NMR spectroscopy. Cp'<sub>3</sub>ThH and Cp'<sub>3</sub>ThBr were also observed in the spectrum. Other unidentifiable peaks were also present.

**Decomposition of A.** Cp'<sub>3</sub>ThBr (24 mg, 0.033 mmol) was dissolved in THF (1 mL). KC<sub>8</sub> (excess) was added and the solution immediately became the dark blue color of A. The solution was stirred at room temperature for 90 min at which point the solution had become colorless with black solids, presumably graphite. The solids were removed via centrifugation and the grey solution was dried under vacuum. The <sup>1</sup>H NMR spectrum in C<sub>6</sub>D<sub>6</sub> displayed multiple unidentifiable peaks, along with Cp'<sub>3</sub>ThH.<sup>1</sup> When the same reaction was done in THF-*d*<sub>8</sub>, a similar <sup>1</sup>H NMR spectrum was observed. The <sup>2</sup>H spectrum displayed only THF-*d*<sub>8</sub> peaks.

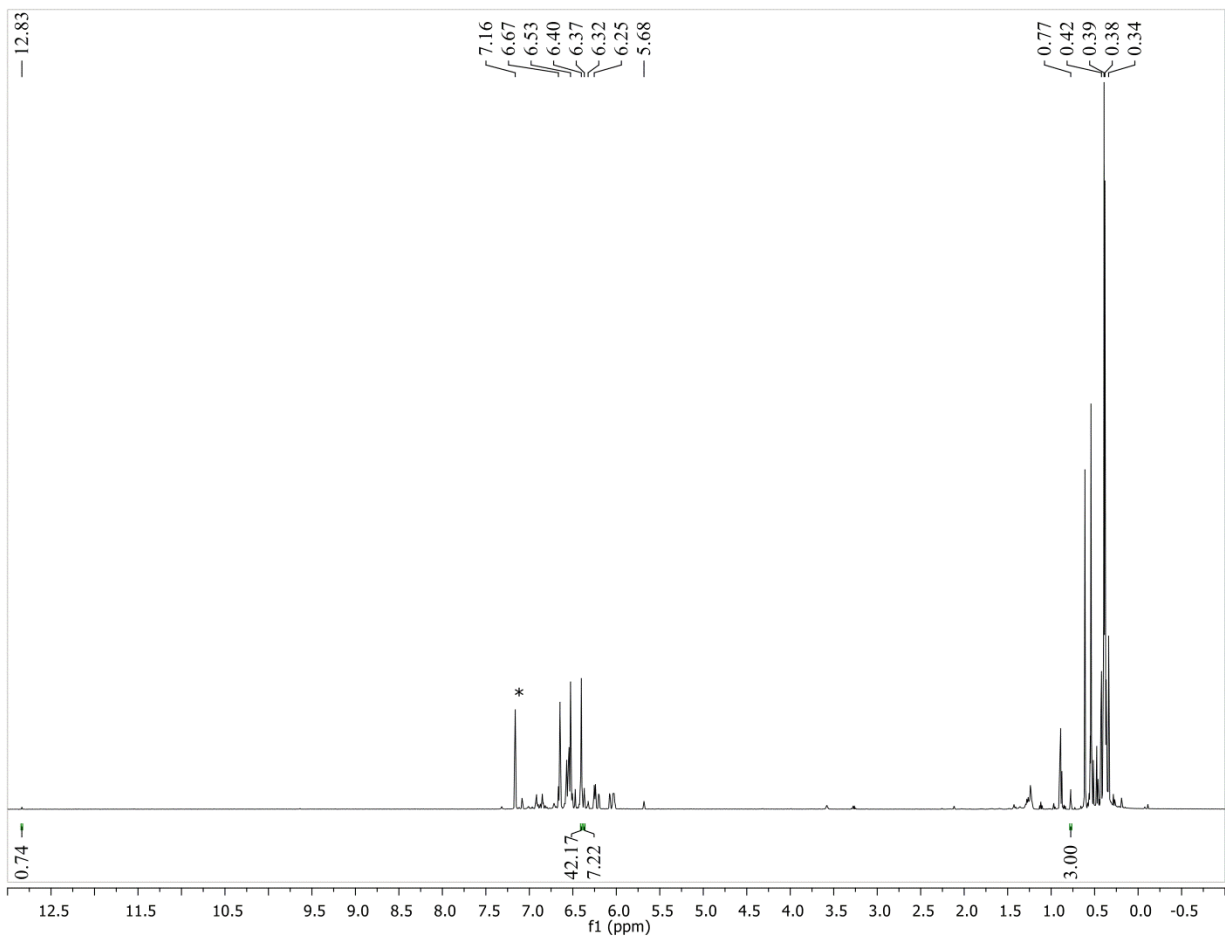

**Fig. S1.**  $^1\text{H}$  NMR spectrum of reaction of **A** with MeI. Residual  $\text{C}_6\text{D}_5\text{H}$  peak is labeled with \*.

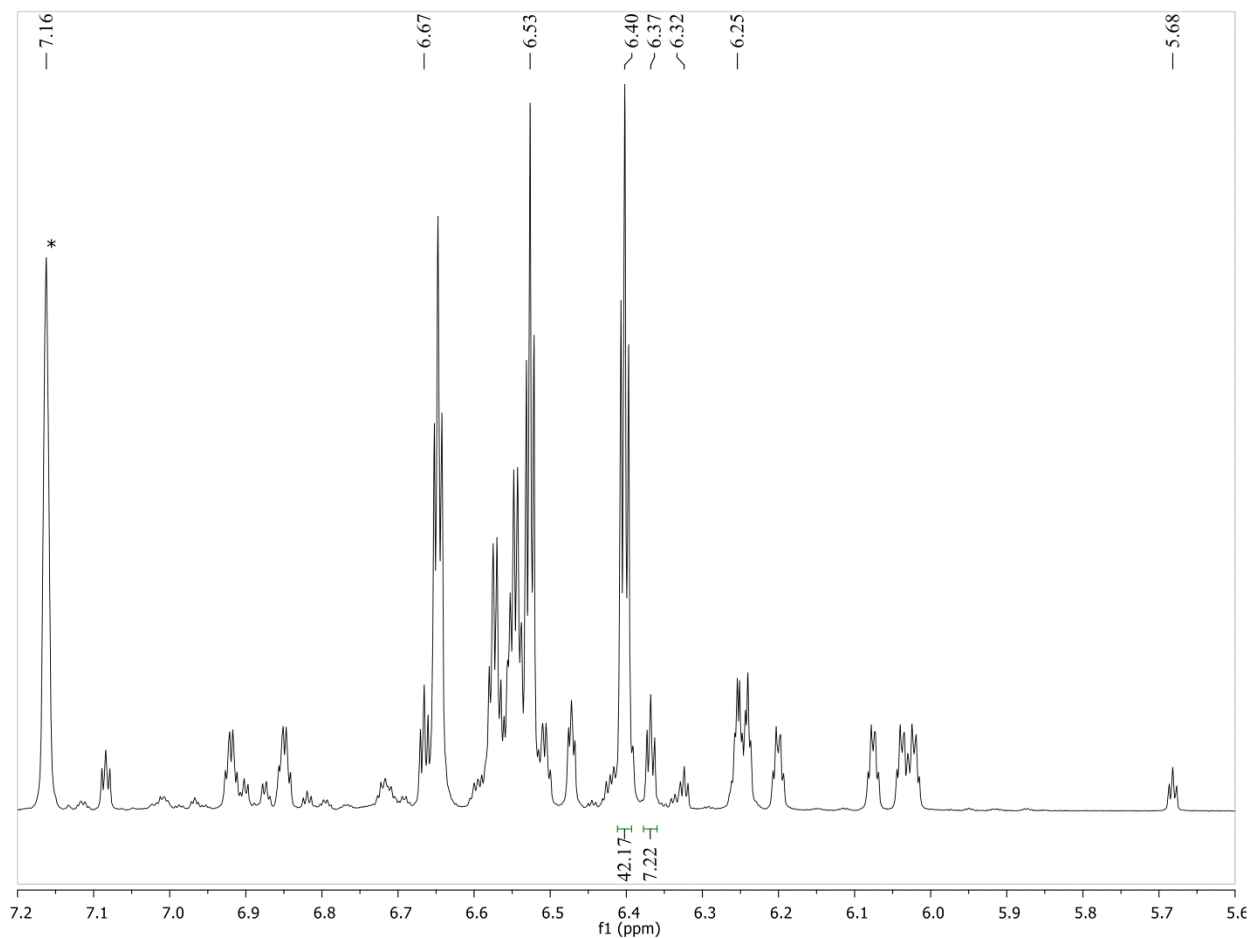

**Fig. S2.** Expanded <sup>1</sup>H NMR spectrum of reaction of **A** with MeI. Residual C<sub>6</sub>D<sub>5</sub>H peak is labeled with \*.

### **X-ray Data Collection, Structure Solution and Refinement for Cp'<sub>3</sub>ThBr**

A colorless crystal of approximate dimensions 0.194 x 0.199 x 0.258 mm was mounted on a glass fiber and transferred to a Bruker SMART APEX II diffractometer. The APEX2<sup>2</sup> program package was used to determine the unit-cell parameters and for data collection (25 sec/frame scan time for a sphere of diffraction data). The raw frame data was processed using SAINT<sup>3</sup> and SADABS<sup>4</sup> to yield the reflection data file. Subsequent calculations were carried out

using the SHELXTL<sup>5</sup> program. The diffraction symmetry was  $2/m$  and the systematic absences were consistent with the monoclinic space group  $P2_1/c$  that was later determined to be correct. The structure was solved by direct methods and refined on  $F^2$  by full-matrix least-squares techniques. The analytical scattering factors<sup>6</sup> for neutral atoms were used throughout the analysis. Hydrogen atoms were included using a riding model. There were two molecules of the formula-unit present.

Least-squares analysis yielded  $wR2 = 0.0687$  and  $Goof = 1.073$  for 541 variables refined against 13207 data ( $0.76 \text{ \AA}$ ),  $R1 = 0.0286$  for those 10983 data with  $I > 2.0\sigma(I)$ .

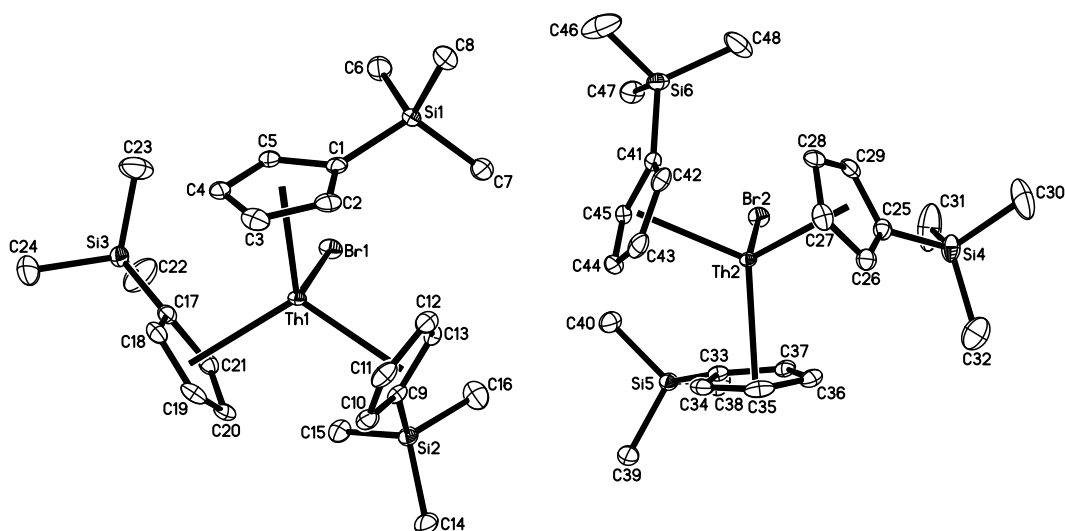

**Fig. S3.** ORTEP representation of  $Cp'_3ThBr$  with thermal ellipsoids drawn at the 50% probability level. Hydrogen atoms are omitted for clarity.

**Table S1.** Crystal data and structure refinement for  $Cp'_3ThBr$ .

|                     |                            |
|---------------------|----------------------------|
| Identification code | jcw6 (Justin Wedal)        |
| Empirical formula   | $C_{24} H_{39} Br Si_3 Th$ |
| Formula weight      | 723.77                     |
| Temperature         | 133(2) K                   |

|                                            |                                                                    |                              |  |
|--------------------------------------------|--------------------------------------------------------------------|------------------------------|--|
| Wavelength                                 | 0.71073 Å                                                          |                              |  |
| Crystal system                             | Monoclinic                                                         |                              |  |
| Space group                                | $P2_1/c$                                                           |                              |  |
| Unit cell dimensions                       | $a = 21.7256(15)$ Å                                                | $\alpha = 90^\circ$ .        |  |
|                                            | $b = 16.9264(12)$ Å                                                | $\beta = 91.1625(8)^\circ$ . |  |
|                                            | $c = 15.1850(10)$ Å                                                | $\gamma = 90^\circ$ .        |  |
| Volume                                     | $5582.9(7)$ Å <sup>3</sup>                                         |                              |  |
| Z                                          | 8                                                                  |                              |  |
| Density (calculated)                       | 1.722 Mg/m <sup>3</sup>                                            |                              |  |
| Absorption coefficient                     | 6.911 mm <sup>-1</sup>                                             |                              |  |
| F(000)                                     | 2800                                                               |                              |  |
| Crystal color                              | colorless                                                          |                              |  |
| Crystal size                               | 0.258 x 0.199 x 0.194 mm <sup>3</sup>                              |                              |  |
| Theta range for data collection            | 1.525 to 27.894°                                                   |                              |  |
| Index ranges                               | $-28 \leq h \leq 28$ , $-21 \leq k \leq 22$ , $-19 \leq l \leq 19$ |                              |  |
| Reflections collected                      | 65691                                                              |                              |  |
| Independent reflections                    | 13207 [R(int) = 0.0251]                                            |                              |  |
| Completeness to theta = 25.500°            | 99.9 %                                                             |                              |  |
| Absorption correction                      | Semi-empirical from equivalents                                    |                              |  |
| Max. and min. transmission                 | 0.4308 and 0.2963                                                  |                              |  |
| Refinement method                          | Full-matrix least-squares on F <sup>2</sup>                        |                              |  |
| Data / restraints / parameters             | 13207 / 0 / 541                                                    |                              |  |
| Goodness-of-fit on F <sup>2</sup>          | 1.073                                                              |                              |  |
| Final R indices [I>2sigma(I) = 10983 data] | R1 = 0.0286, wR2 = 0.0656                                          |                              |  |
| R indices (all data, 0.76 Å)               | R1 = 0.0372, wR2 = 0.0687                                          |                              |  |
| Largest diff. peak and hole                | 3.725 and -1.641 e.Å <sup>-3</sup>                                 |                              |  |

**Table S2.** Bond lengths [Å] and angles [°] for Cp<sub>3</sub>ThBr.

|             |          |             |          |
|-------------|----------|-------------|----------|
| Th(1)-Cnt1  | 2.537    | Th(1)-C(4)  | 2.792(4) |
| Th(1)-Cnt2  | 2.539    | Th(1)-C(20) | 2.792(4) |
| Th(1)-Cnt3  | 2.546    | Th(1)-C(12) | 2.798(4) |
| Th(1)-C(19) | 2.775(4) | Th(1)-C(13) | 2.803(4) |
| Th(1)-C(3)  | 2.776(4) | Th(1)-C(5)  | 2.811(4) |
| Th(1)-C(11) | 2.788(4) | Th(1)-C(2)  | 2.819(4) |



|             |           |             |           |
|-------------|-----------|-------------|-----------|
| Th(1)-C(10) | 2.819(4)  | Th(2)-Cnt6  | 2.544     |
| Th(1)-C(21) | 2.826(4)  | Th(2)-C(43) | 2.772(4)  |
| Th(1)-C(18) | 2.826(4)  | Th(2)-C(27) | 2.776(4)  |
| Th(1)-C(9)  | 2.834(4)  | Th(2)-C(35) | 2.784(4)  |
| Th(1)-C(1)  | 2.840(4)  | Th(2)-C(36) | 2.798(4)  |
| Th(1)-Br(1) | 2.8515(4) | Th(2)-C(26) | 2.803(4)  |
| Th(1)-C(17) | 2.864(4)  | Th(2)-C(44) | 2.808(4)  |
| Si(1)-C(7)  | 1.854(4)  | Th(2)-C(42) | 2.817(4)  |
| Si(1)-C(6)  | 1.858(4)  | Th(2)-C(28) | 2.822(4)  |
| Si(1)-C(1)  | 1.874(4)  | Th(2)-C(37) | 2.823(4)  |
| Si(1)-C(8)  | 1.874(5)  | Th(2)-C(34) | 2.827(4)  |
| Si(2)-C(15) | 1.853(4)  | Th(2)-C(29) | 2.828(4)  |
| Si(2)-C(14) | 1.864(4)  | Th(2)-C(45) | 2.831(4)  |
| Si(2)-C(16) | 1.867(5)  | Th(2)-C(25) | 2.839(4)  |
| Si(2)-C(9)  | 1.884(4)  | Th(2)-Br(2) | 2.8450(4) |
| Si(3)-C(23) | 1.853(5)  | Th(2)-C(41) | 2.846(4)  |
| Si(3)-C(22) | 1.859(6)  | Th(2)-C(33) | 2.853(4)  |
| Si(3)-C(24) | 1.861(5)  | Si(4)-C(31) | 1.854(6)  |
| Si(3)-C(17) | 1.868(4)  | Si(4)-C(30) | 1.857(5)  |
| C(1)-C(2)   | 1.425(6)  | Si(4)-C(32) | 1.858(6)  |
| C(1)-C(5)   | 1.432(5)  | Si(4)-C(25) | 1.869(4)  |
| C(2)-C(3)   | 1.405(6)  | Si(5)-C(39) | 1.857(5)  |
| C(3)-C(4)   | 1.414(6)  | Si(5)-C(33) | 1.865(4)  |
| C(4)-C(5)   | 1.401(6)  | Si(5)-C(40) | 1.866(4)  |
| C(9)-C(13)  | 1.422(5)  | Si(5)-C(38) | 1.875(5)  |
| C(9)-C(10)  | 1.423(6)  | Si(6)-C(48) | 1.858(5)  |
| C(10)-C(11) | 1.406(6)  | Si(6)-C(46) | 1.866(5)  |
| C(11)-C(12) | 1.412(6)  | Si(6)-C(41) | 1.873(4)  |
| C(12)-C(13) | 1.391(6)  | Si(6)-C(47) | 1.874(4)  |
| C(17)-C(21) | 1.423(5)  | C(25)-C(29) | 1.421(6)  |
| C(17)-C(18) | 1.433(6)  | C(25)-C(26) | 1.422(6)  |
| C(18)-C(19) | 1.408(6)  | C(26)-C(27) | 1.411(6)  |
| C(19)-C(20) | 1.418(6)  | C(27)-C(28) | 1.413(6)  |
| C(20)-C(21) | 1.395(6)  | C(28)-C(29) | 1.402(6)  |
| Th(2)-Cnt4  | 2.544     | C(33)-C(34) | 1.422(5)  |
| Th(2)-Cnt5  | 2.547     | C(33)-C(37) | 1.434(6)  |

|                   |            |                   |            |
|-------------------|------------|-------------------|------------|
| C(34)-C(35)       | 1.408(6)   | C(19)-Th(1)-C(5)  | 119.42(12) |
| C(35)-C(36)       | 1.409(6)   | C(3)-Th(1)-C(5)   | 47.99(12)  |
| C(36)-C(37)       | 1.398(6)   | C(11)-Th(1)-C(5)  | 123.74(12) |
| C(41)-C(45)       | 1.424(5)   | C(4)-Th(1)-C(5)   | 28.96(11)  |
| C(41)-C(42)       | 1.428(6)   | C(20)-Th(1)-C(5)  | 136.55(12) |
| C(42)-C(43)       | 1.414(6)   | C(12)-Th(1)-C(5)  | 106.61(11) |
| C(43)-C(44)       | 1.411(6)   | C(13)-Th(1)-C(5)  | 116.80(11) |
| C(44)-C(45)       | 1.400(6)   | C(19)-Th(1)-C(2)  | 116.46(12) |
|                   |            | C(3)-Th(1)-C(2)   | 29.07(12)  |
| Cnt1-Th(1)-Br(1)  | 101.2      | C(11)-Th(1)-C(2)  | 76.57(12)  |
| Cnt2-Th(1)-Br(1)  | 101.5      | C(4)-Th(1)-C(2)   | 47.96(12)  |
| Cnt3-Th(1)-Br(1)  | 100.8      | C(20)-Th(1)-C(2)  | 145.50(12) |
| Cnt1-Th(1)-Cnt2   | 116.2      | C(12)-Th(1)-C(2)  | 67.51(12)  |
| Cnt1-Th(1)-Cnt3   | 116.8      | C(13)-Th(1)-C(2)  | 91.27(12)  |
| Cnt2-Th(1)-Cnt3   | 116.0      | C(5)-Th(1)-C(2)   | 47.63(12)  |
| C(19)-Th(1)-C(3)  | 90.66(12)  | C(19)-Th(1)-C(10) | 75.31(13)  |
| C(19)-Th(1)-C(11) | 88.20(13)  | C(3)-Th(1)-C(10)  | 113.64(13) |
| C(3)-Th(1)-C(11)  | 87.98(13)  | C(11)-Th(1)-C(10) | 29.03(12)  |
| C(19)-Th(1)-C(4)  | 92.41(12)  | C(4)-Th(1)-C(10)  | 142.12(12) |
| C(3)-Th(1)-C(4)   | 29.42(13)  | C(20)-Th(1)-C(10) | 68.04(12)  |
| C(11)-Th(1)-C(4)  | 117.38(12) | C(12)-Th(1)-C(10) | 47.72(12)  |
| C(19)-Th(1)-C(20) | 29.51(12)  | C(13)-Th(1)-C(10) | 47.54(12)  |
| C(3)-Th(1)-C(20)  | 120.02(12) | C(5)-Th(1)-C(10)  | 152.40(12) |
| C(11)-Th(1)-C(20) | 92.16(13)  | C(2)-Th(1)-C(10)  | 105.60(12) |
| C(4)-Th(1)-C(20)  | 116.11(12) | C(19)-Th(1)-C(21) | 47.91(12)  |
| C(19)-Th(1)-C(12) | 117.34(13) | C(3)-Th(1)-C(21)  | 123.90(12) |
| C(3)-Th(1)-C(12)  | 90.59(13)  | C(11)-Th(1)-C(21) | 119.75(12) |
| C(11)-Th(1)-C(12) | 29.29(13)  | C(4)-Th(1)-C(21)  | 105.24(12) |
| C(4)-Th(1)-C(12)  | 115.44(12) | C(20)-Th(1)-C(21) | 28.76(12)  |
| C(20)-Th(1)-C(12) | 115.74(12) | C(12)-Th(1)-C(21) | 137.89(11) |
| C(19)-Th(1)-C(13) | 121.97(12) | C(13)-Th(1)-C(21) | 116.53(11) |
| C(3)-Th(1)-C(13)  | 117.76(12) | C(5)-Th(1)-C(21)  | 114.40(12) |
| C(11)-Th(1)-C(13) | 47.88(12)  | C(2)-Th(1)-C(21)  | 152.12(12) |
| C(4)-Th(1)-C(13)  | 137.23(12) | C(10)-Th(1)-C(21) | 92.89(12)  |
| C(20)-Th(1)-C(13) | 105.25(12) | C(19)-Th(1)-C(18) | 29.10(12)  |
| C(12)-Th(1)-C(13) | 28.76(11)  | C(3)-Th(1)-C(18)  | 77.66(12)  |

|                   |            |                   |            |
|-------------------|------------|-------------------|------------|
| C(11)-Th(1)-C(18) | 113.32(12) | C(11)-Th(1)-Br(1) | 126.30(9)  |
| C(4)-Th(1)-C(18)  | 68.30(12)  | C(4)-Th(1)-Br(1)  | 103.01(9)  |
| C(20)-Th(1)-C(18) | 47.84(12)  | C(20)-Th(1)-Br(1) | 100.68(8)  |
| C(12)-Th(1)-C(18) | 142.03(12) | C(12)-Th(1)-Br(1) | 102.44(9)  |
| C(13)-Th(1)-C(18) | 150.77(12) | C(13)-Th(1)-Br(1) | 78.49(8)   |
| C(5)-Th(1)-C(18)  | 92.12(12)  | C(5)-Th(1)-Br(1)  | 78.45(8)   |
| C(2)-Th(1)-C(18)  | 106.74(12) | C(2)-Th(1)-Br(1)  | 112.34(8)  |
| C(10)-Th(1)-C(18) | 104.37(12) | C(10)-Th(1)-Br(1) | 113.37(8)  |
| C(21)-Th(1)-C(18) | 47.33(11)  | C(21)-Th(1)-Br(1) | 77.55(8)   |
| C(19)-Th(1)-C(9)  | 95.06(12)  | C(18)-Th(1)-Br(1) | 113.70(8)  |
| C(3)-Th(1)-C(9)   | 135.62(12) | C(9)-Th(1)-Br(1)  | 84.49(8)   |
| C(11)-Th(1)-C(9)  | 48.42(11)  | C(1)-Th(1)-Br(1)  | 83.58(8)   |
| C(4)-Th(1)-C(9)   | 163.53(12) | C(19)-Th(1)-C(17) | 48.54(12)  |
| C(20)-Th(1)-C(9)  | 76.05(12)  | C(3)-Th(1)-C(17)  | 96.91(12)  |
| C(12)-Th(1)-C(9)  | 48.17(11)  | C(11)-Th(1)-C(17) | 136.32(12) |
| C(13)-Th(1)-C(9)  | 29.21(11)  | C(4)-Th(1)-C(17)  | 76.28(12)  |
| C(5)-Th(1)-C(9)   | 145.34(11) | C(20)-Th(1)-C(17) | 48.18(11)  |
| C(2)-Th(1)-C(9)   | 115.68(12) | C(12)-Th(1)-C(17) | 163.81(12) |
| C(10)-Th(1)-C(9)  | 29.16(11)  | C(13)-Th(1)-C(17) | 145.06(11) |
| C(21)-Th(1)-C(9)  | 90.61(11)  | C(5)-Th(1)-C(17)  | 88.97(11)  |
| C(18)-Th(1)-C(9)  | 122.44(12) | C(2)-Th(1)-C(17)  | 123.54(12) |
| C(19)-Th(1)-C(1)  | 138.26(12) | C(10)-Th(1)-C(17) | 116.13(12) |
| C(3)-Th(1)-C(1)   | 48.52(12)  | C(21)-Th(1)-C(17) | 28.96(11)  |
| C(11)-Th(1)-C(1)  | 97.25(12)  | C(18)-Th(1)-C(17) | 29.16(11)  |
| C(4)-Th(1)-C(1)   | 48.52(11)  | C(9)-Th(1)-C(17)  | 119.41(11) |
| C(20)-Th(1)-C(1)  | 164.54(12) | C(1)-Th(1)-C(17)  | 118.30(11) |
| C(12)-Th(1)-C(1)  | 77.27(11)  | Br(1)-Th(1)-C(17) | 84.67(8)   |
| C(13)-Th(1)-C(1)  | 90.14(11)  | C(7)-Si(1)-C(6)   | 108.1(2)   |
| C(5)-Th(1)-C(1)   | 29.36(11)  | C(7)-Si(1)-C(1)   | 115.99(18) |
| C(2)-Th(1)-C(1)   | 29.15(11)  | C(6)-Si(1)-C(1)   | 107.19(19) |
| C(10)-Th(1)-C(1)  | 124.11(12) | C(7)-Si(1)-C(8)   | 108.1(2)   |
| C(21)-Th(1)-C(1)  | 142.82(11) | C(6)-Si(1)-C(8)   | 110.2(2)   |
| C(18)-Th(1)-C(1)  | 116.81(11) | C(1)-Si(1)-C(8)   | 107.32(19) |
| C(9)-Th(1)-C(1)   | 119.31(11) | C(15)-Si(2)-C(14) | 108.6(2)   |
| C(19)-Th(1)-Br(1) | 125.46(9)  | C(15)-Si(2)-C(16) | 107.5(2)   |
| C(3)-Th(1)-Br(1)  | 126.24(9)  | C(14)-Si(2)-C(16) | 111.3(2)   |

|                   |            |                   |            |
|-------------------|------------|-------------------|------------|
| C(15)-Si(2)-C(9)  | 115.53(18) | C(10)-C(11)-C(12) | 107.5(4)   |
| C(14)-Si(2)-C(9)  | 107.8(2)   | C(10)-C(11)-Th(1) | 76.7(2)    |
| C(16)-Si(2)-C(9)  | 106.14(19) | C(12)-C(11)-Th(1) | 75.7(2)    |
| C(23)-Si(3)-C(22) | 106.7(3)   | C(13)-C(12)-C(11) | 108.1(4)   |
| C(23)-Si(3)-C(24) | 108.3(3)   | C(13)-C(12)-Th(1) | 75.8(2)    |
| C(22)-Si(3)-C(24) | 109.3(3)   | C(11)-C(12)-Th(1) | 75.0(2)    |
| C(23)-Si(3)-C(17) | 116.1(2)   | C(12)-C(13)-C(9)  | 109.6(4)   |
| C(22)-Si(3)-C(17) | 107.8(2)   | C(12)-C(13)-Th(1) | 75.4(2)    |
| C(24)-Si(3)-C(17) | 108.5(2)   | C(9)-C(13)-Th(1)  | 76.6(2)    |
| C(2)-C(1)-C(5)    | 105.4(3)   | C(21)-C(17)-C(18) | 105.2(4)   |
| C(2)-C(1)-Si(1)   | 130.3(3)   | C(21)-C(17)-Si(3) | 123.4(3)   |
| C(5)-C(1)-Si(1)   | 122.8(3)   | C(18)-C(17)-Si(3) | 129.1(3)   |
| C(2)-C(1)-Th(1)   | 74.6(2)    | C(21)-C(17)-Th(1) | 74.0(2)    |
| C(5)-C(1)-Th(1)   | 74.2(2)    | C(18)-C(17)-Th(1) | 74.0(2)    |
| Si(1)-C(1)-Th(1)  | 126.68(17) | Si(3)-C(17)-Th(1) | 130.13(18) |
| C(3)-C(2)-C(1)    | 109.3(4)   | C(19)-C(18)-C(17) | 109.4(4)   |
| C(3)-C(2)-Th(1)   | 73.7(2)    | C(19)-C(18)-Th(1) | 73.4(2)    |
| C(1)-C(2)-Th(1)   | 76.2(2)    | C(17)-C(18)-Th(1) | 76.9(2)    |
| C(2)-C(3)-C(4)    | 108.0(4)   | C(18)-C(19)-C(20) | 107.4(4)   |
| C(2)-C(3)-Th(1)   | 77.2(2)    | C(18)-C(19)-Th(1) | 77.5(2)    |
| C(4)-C(3)-Th(1)   | 75.9(2)    | C(20)-C(19)-Th(1) | 75.9(2)    |
| C(5)-C(4)-C(3)    | 107.7(4)   | C(21)-C(20)-C(19) | 107.9(4)   |
| C(5)-C(4)-Th(1)   | 76.3(2)    | C(21)-C(20)-Th(1) | 77.0(2)    |
| C(3)-C(4)-Th(1)   | 74.7(2)    | C(19)-C(20)-Th(1) | 74.6(2)    |
| C(4)-C(5)-C(1)    | 109.5(4)   | C(20)-C(21)-C(17) | 110.1(4)   |
| C(4)-C(5)-Th(1)   | 74.8(2)    | C(20)-C(21)-Th(1) | 74.3(2)    |
| C(1)-C(5)-Th(1)   | 76.4(2)    | C(17)-C(21)-Th(1) | 77.0(2)    |
| C(13)-C(9)-C(10)  | 105.6(3)   | Cnt4-Th(2)-Br(2)  | 102.7      |
| C(13)-C(9)-Si(2)  | 123.4(3)   | Cnt5-Th(2)-Br(2)  | 100.0      |
| C(10)-C(9)-Si(2)  | 129.2(3)   | Cnt6-Th(2)-Br(2)  | 100.9      |
| C(13)-C(9)-Th(1)  | 74.2(2)    | Cnt4-Th(1)-Cnt5   | 116.1      |
| C(10)-C(9)-Th(1)  | 74.9(2)    | Cnt4-Th(1)-Cnt6   | 115.4      |
| Si(2)-C(9)-Th(1)  | 127.73(18) | Cnt5-Th(1)-Cnt6   | 117.5      |
| C(11)-C(10)-C(9)  | 109.2(4)   | C(43)-Th(2)-C(27) | 85.37(13)  |
| C(11)-C(10)-Th(1) | 74.3(2)    | C(43)-Th(2)-C(35) | 89.65(13)  |
| C(9)-C(10)-Th(1)  | 76.0(2)    | C(27)-Th(2)-C(35) | 91.03(13)  |

|                   |            |                   |            |
|-------------------|------------|-------------------|------------|
| C(43)-Th(2)-C(36) | 118.89(13) | C(36)-Th(2)-C(34) | 47.64(12)  |
| C(27)-Th(2)-C(36) | 92.68(12)  | C(26)-Th(2)-C(34) | 106.03(12) |
| C(35)-Th(2)-C(36) | 29.24(13)  | C(44)-Th(2)-C(34) | 68.25(12)  |
| C(43)-Th(2)-C(26) | 110.62(13) | C(42)-Th(2)-C(34) | 108.87(12) |
| C(27)-Th(2)-C(26) | 29.30(12)  | C(28)-Th(2)-C(34) | 145.95(12) |
| C(35)-Th(2)-C(26) | 76.97(13)  | C(37)-Th(2)-C(34) | 47.41(12)  |
| C(36)-Th(2)-C(26) | 67.84(12)  | C(43)-Th(2)-C(29) | 117.66(13) |
| C(43)-Th(2)-C(44) | 29.28(13)  | C(27)-Th(2)-C(29) | 47.79(12)  |
| C(27)-Th(2)-C(44) | 114.64(12) | C(35)-Th(2)-C(29) | 122.92(13) |
| C(35)-Th(2)-C(44) | 90.21(13)  | C(36)-Th(2)-C(29) | 104.07(12) |
| C(36)-Th(2)-C(44) | 115.68(12) | C(26)-Th(2)-C(29) | 47.36(12)  |
| C(26)-Th(2)-C(44) | 138.86(12) | C(44)-Th(2)-C(29) | 138.00(12) |
| C(43)-Th(2)-C(42) | 29.31(12)  | C(42)-Th(2)-C(29) | 91.61(12)  |
| C(27)-Th(2)-C(42) | 74.52(12)  | C(28)-Th(2)-C(29) | 28.73(12)  |
| C(35)-Th(2)-C(42) | 116.51(13) | C(37)-Th(2)-C(29) | 112.89(12) |
| C(36)-Th(2)-C(42) | 144.59(12) | C(34)-Th(2)-C(29) | 150.86(12) |
| C(26)-Th(2)-C(42) | 103.80(12) | C(43)-Th(2)-C(45) | 47.94(12)  |
| C(44)-Th(2)-C(42) | 47.76(12)  | C(27)-Th(2)-C(45) | 121.68(12) |
| C(43)-Th(2)-C(28) | 89.87(13)  | C(35)-Th(2)-C(45) | 116.55(13) |
| C(27)-Th(2)-C(28) | 29.22(12)  | C(36)-Th(2)-C(45) | 136.35(12) |
| C(35)-Th(2)-C(28) | 119.97(13) | C(26)-Th(2)-C(45) | 150.92(12) |
| C(36)-Th(2)-C(28) | 115.54(12) | C(44)-Th(2)-C(45) | 28.75(11)  |
| C(26)-Th(2)-C(28) | 47.79(12)  | C(42)-Th(2)-C(45) | 47.42(12)  |
| C(44)-Th(2)-C(28) | 114.66(12) | C(28)-Th(2)-C(45) | 106.50(12) |
| C(42)-Th(2)-C(28) | 66.98(12)  | C(37)-Th(2)-C(45) | 116.84(11) |
| C(43)-Th(2)-C(37) | 126.82(12) | C(34)-Th(2)-C(45) | 90.35(12)  |
| C(27)-Th(2)-C(37) | 119.38(12) | C(29)-Th(2)-C(45) | 118.74(12) |
| C(35)-Th(2)-C(37) | 47.87(12)  | C(43)-Th(2)-C(25) | 133.67(13) |
| C(36)-Th(2)-C(37) | 28.79(11)  | C(27)-Th(2)-C(25) | 48.64(12)  |
| C(26)-Th(2)-C(37) | 91.54(12)  | C(35)-Th(2)-C(25) | 95.59(13)  |
| C(44)-Th(2)-C(37) | 108.53(12) | C(36)-Th(2)-C(25) | 75.05(12)  |
| C(42)-Th(2)-C(37) | 155.32(12) | C(26)-Th(2)-C(25) | 29.18(11)  |
| C(28)-Th(2)-C(37) | 135.38(12) | C(44)-Th(2)-C(25) | 162.22(12) |
| C(43)-Th(2)-C(34) | 79.66(13)  | C(42)-Th(2)-C(25) | 115.13(12) |
| C(27)-Th(2)-C(34) | 116.97(13) | C(28)-Th(2)-C(25) | 48.21(12)  |
| C(35)-Th(2)-C(34) | 29.06(13)  | C(37)-Th(2)-C(25) | 87.61(11)  |

|                   |            |                   |            |
|-------------------|------------|-------------------|------------|
| C(34)-Th(2)-C(25) | 122.05(12) | C(42)-Th(2)-C(33) | 126.87(12) |
| C(29)-Th(2)-C(25) | 29.05(11)  | C(28)-Th(2)-C(33) | 163.53(12) |
| C(45)-Th(2)-C(25) | 147.51(11) | C(37)-Th(2)-C(33) | 29.26(11)  |
| C(43)-Th(2)-Br(2) | 126.26(9)  | C(34)-Th(2)-C(33) | 28.99(11)  |
| C(27)-Th(2)-Br(2) | 127.07(9)  | C(29)-Th(2)-C(33) | 141.25(12) |
| C(35)-Th(2)-Br(2) | 125.19(9)  | C(45)-Th(2)-C(33) | 89.94(11)  |
| C(36)-Th(2)-Br(2) | 102.74(8)  | C(25)-Th(2)-C(33) | 116.83(11) |
| C(26)-Th(2)-Br(2) | 115.94(8)  | Br(2)-Th(2)-C(33) | 81.92(8)   |
| C(44)-Th(2)-Br(2) | 103.48(9)  | C(41)-Th(2)-C(33) | 118.96(11) |
| C(42)-Th(2)-Br(2) | 111.36(8)  | C(31)-Si(4)-C(30) | 109.2(3)   |
| C(28)-Th(2)-Br(2) | 101.95(9)  | C(31)-Si(4)-C(32) | 110.0(3)   |
| C(37)-Th(2)-Br(2) | 77.70(8)   | C(30)-Si(4)-C(32) | 107.1(3)   |
| C(34)-Th(2)-Br(2) | 110.41(8)  | C(31)-Si(4)-C(25) | 111.5(2)   |
| C(29)-Th(2)-Br(2) | 79.30(9)   | C(30)-Si(4)-C(25) | 106.6(2)   |
| C(45)-Th(2)-Br(2) | 78.65(8)   | C(32)-Si(4)-C(25) | 112.3(2)   |
| C(25)-Th(2)-Br(2) | 86.87(8)   | C(39)-Si(5)-C(33) | 107.9(2)   |
| C(43)-Th(2)-C(41) | 48.72(12)  | C(39)-Si(5)-C(40) | 107.2(2)   |
| C(27)-Th(2)-C(41) | 96.09(12)  | C(33)-Si(5)-C(40) | 115.33(19) |
| C(35)-Th(2)-C(41) | 136.64(13) | C(39)-Si(5)-C(38) | 110.1(2)   |
| C(36)-Th(2)-C(41) | 163.81(12) | C(33)-Si(5)-C(38) | 108.2(2)   |
| C(26)-Th(2)-C(41) | 123.80(12) | C(40)-Si(5)-C(38) | 108.0(2)   |
| C(44)-Th(2)-C(41) | 48.18(11)  | C(48)-Si(6)-C(46) | 109.1(3)   |
| C(42)-Th(2)-C(41) | 29.21(11)  | C(48)-Si(6)-C(41) | 115.3(2)   |
| C(28)-Th(2)-C(41) | 77.50(12)  | C(46)-Si(6)-C(41) | 107.0(2)   |
| C(37)-Th(2)-C(41) | 144.46(11) | C(48)-Si(6)-C(47) | 107.5(2)   |
| C(34)-Th(2)-C(41) | 116.18(12) | C(46)-Si(6)-C(47) | 109.4(3)   |
| C(29)-Th(2)-C(41) | 91.87(12)  | C(41)-Si(6)-C(47) | 108.41(19) |
| C(45)-Th(2)-C(41) | 29.06(11)  | C(29)-C(25)-C(26) | 105.4(4)   |
| C(25)-Th(2)-C(41) | 120.79(11) | C(29)-C(25)-Si(4) | 122.9(3)   |
| Br(2)-Th(2)-C(41) | 82.71(8)   | C(26)-C(25)-Si(4) | 128.5(3)   |
| C(43)-Th(2)-C(33) | 100.79(13) | C(29)-C(25)-Th(2) | 75.1(2)    |
| C(27)-Th(2)-C(33) | 138.42(12) | C(26)-C(25)-Th(2) | 74.0(2)    |
| C(35)-Th(2)-C(33) | 48.41(12)  | Si(4)-C(25)-Th(2) | 131.70(18) |
| C(36)-Th(2)-C(33) | 48.21(12)  | C(27)-C(26)-C(25) | 109.5(4)   |
| C(26)-Th(2)-C(33) | 116.05(12) | C(27)-C(26)-Th(2) | 74.3(2)    |
| C(44)-Th(2)-C(33) | 79.37(12)  | C(25)-C(26)-Th(2) | 76.8(2)    |

|                   |            |                   |            |
|-------------------|------------|-------------------|------------|
| C(26)-C(27)-C(28) | 107.6(4)   | C(35)-C(36)-Th(2) | 74.8(2)    |
| C(26)-C(27)-Th(2) | 76.4(2)    | C(36)-C(37)-C(33) | 109.2(4)   |
| C(28)-C(27)-Th(2) | 77.2(2)    | C(36)-C(37)-Th(2) | 74.6(2)    |
| C(29)-C(28)-C(27) | 107.5(4)   | C(33)-C(37)-Th(2) | 76.5(2)    |
| C(29)-C(28)-Th(2) | 75.9(2)    | C(45)-C(41)-C(42) | 105.5(3)   |
| C(27)-C(28)-Th(2) | 73.6(2)    | C(45)-C(41)-Si(6) | 122.8(3)   |
| C(28)-C(29)-C(25) | 109.9(4)   | C(42)-C(41)-Si(6) | 129.9(3)   |
| C(28)-C(29)-Th(2) | 75.4(2)    | C(45)-C(41)-Th(2) | 74.9(2)    |
| C(25)-C(29)-Th(2) | 75.9(2)    | C(42)-C(41)-Th(2) | 74.3(2)    |
| C(34)-C(33)-C(37) | 105.4(4)   | Si(6)-C(41)-Th(2) | 127.53(18) |
| C(34)-C(33)-Si(5) | 127.6(3)   | C(43)-C(42)-C(41) | 109.2(4)   |
| C(37)-C(33)-Si(5) | 125.1(3)   | C(43)-C(42)-Th(2) | 73.6(2)    |
| C(34)-C(33)-Th(2) | 74.5(2)    | C(41)-C(42)-Th(2) | 76.5(2)    |
| C(37)-C(33)-Th(2) | 74.2(2)    | C(44)-C(43)-C(42) | 107.4(4)   |
| Si(5)-C(33)-Th(2) | 128.49(18) | C(44)-C(43)-Th(2) | 76.8(2)    |
| C(35)-C(34)-C(33) | 109.6(4)   | C(42)-C(43)-Th(2) | 77.1(2)    |
| C(35)-C(34)-Th(2) | 73.8(2)    | C(45)-C(44)-C(43) | 108.2(4)   |
| C(33)-C(34)-Th(2) | 76.5(2)    | C(45)-C(44)-Th(2) | 76.5(2)    |
| C(34)-C(35)-C(36) | 107.5(4)   | C(43)-C(44)-Th(2) | 73.9(2)    |
| C(34)-C(35)-Th(2) | 77.2(2)    | C(44)-C(45)-C(41) | 109.6(4)   |
| C(36)-C(35)-Th(2) | 75.9(2)    | C(44)-C(45)-Th(2) | 74.7(2)    |
| C(37)-C(36)-C(35) | 108.3(4)   | C(41)-C(45)-Th(2) | 76.1(2)    |
| C(37)-C(36)-Th(2) | 76.6(2)    |                   |            |

### **X-ray Data Collection, Structure Solution and Refinement for Cp<sub>3</sub>ThMe**

A colorless crystal of approximate dimensions 0.143 x 0.145 x 0.247 mm was mounted in a cryoloop and transferred to a Bruker SMART APEX II diffractometer. The APEX2<sup>2</sup> program package was used to determine the unit-cell parameters and for data collection (20 sec/frame scan time for a sphere of diffraction data). The raw frame data was processed using SAINT<sup>3</sup> and SADABS<sup>4</sup> to yield the reflection data file. The systematic absences were consistent with the

trigonal space groups  $P3$  and  $P3$ . The centrosymmetric space group  $P3$  was assigned and later determined to be correct.

The structure was solved by dual space methods and refined on  $F^2$  by full-matrix least-squares techniques.<sup>5</sup> The analytical scattering factors<sup>6</sup> for neutral atoms were used throughout the analysis. Hydrogen atoms were included using a riding model. The molecule was located on a three-fold rotation axis.

Least-squares analysis yielded  $wR2 = 0.0303$  and  $Goof = 1.046$  for 91 variables refined against 2483 data ( $0.73 \text{ \AA}$ ),  $R1 = 0.0143$  for those 2357 data with  $I > 2.0\sigma(I)$ .

There were several high residuals present in the final difference-Fourier map. It was not possible to determine the nature of the residuals although it was probable that diethyl ether solvent was present. The SQUEEZE<sup>7a</sup> routine in the PLATON<sup>7b</sup> program package was used to account for the electrons in the solvent accessible voids.



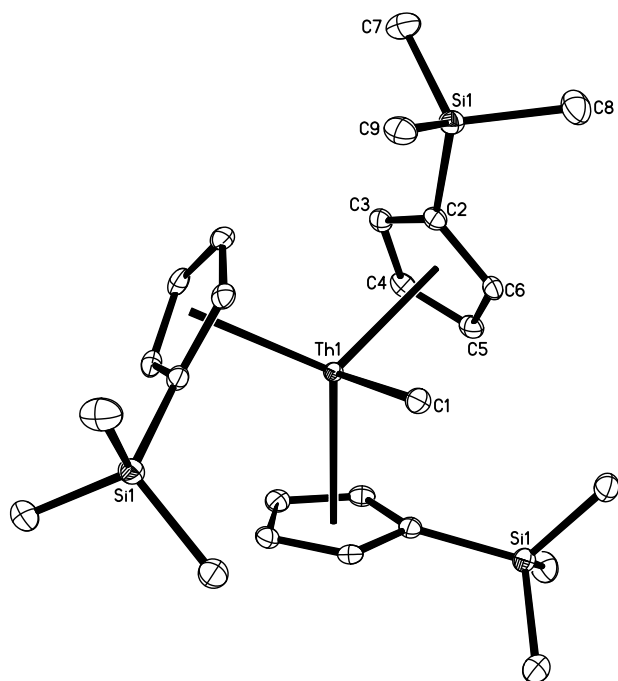

**Fig. S4.** OTREP representation of  $\text{Cp}'_3\text{ThMe}$  with thermal ellipsoids drawn at the 50% probability level. Hydrogen atoms are omitted for clarity.

**Table S3.** Crystal data and structure refinement for  $\text{Cp}'_3\text{ThMe}$ .

|                      |                                                     |                        |
|----------------------|-----------------------------------------------------|------------------------|
| Identification code  | jcw4 (Justin Wedal)                                 |                        |
| Empirical formula    | $\text{C}_{25} \text{H}_{42} \text{Si}_3 \text{Th}$ |                        |
| Formula weight       | 658.89                                              |                        |
| Temperature          | 88(2) K                                             |                        |
| Wavelength           | 0.71073 Å                                           |                        |
| Crystal system       | Trigonal                                            |                        |
| Space group          | $P\bar{3}$                                          |                        |
| Unit cell dimensions | $a = 15.740(2) \text{ \AA}$                         | $\alpha = 90^\circ$ .  |
|                      | $b = 15.740(2) \text{ \AA}$                         | $\beta = 90^\circ$ .   |
|                      | $c = 6.7581(9) \text{ \AA}$                         | $\gamma = 120^\circ$ . |
| Volume               | $1450.0(4) \text{ \AA}^3$                           |                        |
| Z                    | 2                                                   |                        |
| Density (calculated) | $1.509 \text{ Mg/m}^3$                              |                        |

|                                         |                                                             |
|-----------------------------------------|-------------------------------------------------------------|
| Absorption coefficient                  | 5.275 mm <sup>-1</sup>                                      |
| F(000)                                  | 648                                                         |
| Crystal color                           | colorless                                                   |
| Crystal size                            | 0.247 x 0.145 x 0.143 mm <sup>3</sup>                       |
| Theta range for data collection         | 1.494 to 29.104°                                            |
| Index ranges                            | -21 ≤ <i>h</i> ≤ 20, -20 ≤ <i>k</i> ≤ 20, -8 ≤ <i>l</i> ≤ 9 |
| Reflections collected                   | 17774                                                       |
| Independent reflections                 | 2483 [R(int) = 0.0292]                                      |
| Completeness to theta = 25.500°         | 100.0 %                                                     |
| Absorption correction                   | Semi-empirical from equivalents                             |
| Max. and min. transmission              | 0.4318 and 0.3061                                           |
| Refinement method                       | Full-matrix least-squares on F <sup>2</sup>                 |
| Data / restraints / parameters          | 2483 / 0 / 91                                               |
| Goodness-of-fit on F <sup>2</sup>       | 1.046                                                       |
| Final R indices [I > 2σ(I) = 2357 data] | R1 = 0.0143, wR2 = 0.0298                                   |
| R indices (all data, 0.73 Å)            | R1 = 0.0162, wR2 = 0.0303                                   |
| Largest diff. peak and hole             | 0.664 and -0.424 e.Å <sup>-3</sup>                          |

**Table S4.** Bond lengths [Å] and angles [°] for Cp<sub>3</sub>ThMe.

|              |            |                   |            |
|--------------|------------|-------------------|------------|
| Th(1)-Cnt    | 2.559      | Th(1)-C(2)#1      | 2.8714(17) |
| Th(1)-C(1)   | 2.518(3)   | Si(1)-C(7)        | 1.8667(19) |
| Th(1)-C(4)   | 2.7923(16) | Si(1)-C(8)        | 1.868(2)   |
| Th(1)-C(4)#1 | 2.7923(17) | Si(1)-C(9)        | 1.8798(19) |
| Th(1)-C(4)#2 | 2.7923(17) | Si(1)-C(2)        | 1.8825(17) |
| Th(1)-C(5)   | 2.8081(17) | C(2)-C(3)         | 1.425(2)   |
| Th(1)-C(5)#1 | 2.8081(17) | C(2)-C(6)         | 1.429(2)   |
| Th(1)-C(5)#2 | 2.8081(17) | C(3)-C(4)         | 1.408(2)   |
| Th(1)-C(3)#2 | 2.8307(17) | C(4)-C(5)         | 1.414(2)   |
| Th(1)-C(3)#1 | 2.8307(17) | C(5)-C(6)         | 1.407(2)   |
| Th(1)-C(3)   | 2.8307(17) |                   |            |
| Th(1)-C(6)   | 2.8409(16) | Cnt-Th(1)-C(1)    | 97.7       |
| Th(1)-C(6)#1 | 2.8409(16) | Cnt-Th(1)-Cnt     | 118.2      |
| Th(1)-C(6)#2 | 2.8409(16) | C(1)-Th(1)-C(4)   | 121.64(4)  |
| Th(1)-C(2)   | 2.8713(17) | C(1)-Th(1)-C(4)#1 | 121.64(4)  |

|                     |             |                     |           |
|---------------------|-------------|---------------------|-----------|
| C(4)-Th(1)-C(4)#1   | 95.00(5)    | C(4)#1-Th(1)-C(3)   | 77.99(5)  |
| C(1)-Th(1)-C(4)#2   | 121.64(4)   | C(4)#2-Th(1)-C(3)   | 119.47(5) |
| C(4)-Th(1)-C(4)#2   | 95.00(5)    | C(5)-Th(1)-C(3)     | 47.71(5)  |
| C(4)#1-Th(1)-C(4)#2 | 95.00(5)    | C(5)#1-Th(1)-C(3)   | 72.01(5)  |
| C(1)-Th(1)-C(5)     | 96.51(4)    | C(5)#2-Th(1)-C(3)   | 148.65(5) |
| C(4)-Th(1)-C(5)     | 29.24(5)    | C(3)#2-Th(1)-C(3)   | 106.77(4) |
| C(4)#1-Th(1)-C(5)   | 123.30(5)   | C(3)#1-Th(1)-C(3)   | 106.77(4) |
| C(4)#2-Th(1)-C(5)   | 98.35(5)    | C(1)-Th(1)-C(6)     | 74.01(3)  |
| C(1)-Th(1)-C(5)#1   | 96.51(4)    | C(4)-Th(1)-C(6)     | 47.68(5)  |
| C(4)-Th(1)-C(5)#1   | 98.35(5)    | C(4)#1-Th(1)-C(6)   | 121.74(5) |
| C(4)#1-Th(1)-C(5)#1 | 29.24(5)    | C(4)#2-Th(1)-C(6)   | 125.50(5) |
| C(4)#2-Th(1)-C(5)#1 | 123.30(5)   | C(5)-Th(1)-C(6)     | 28.83(5)  |
| C(5)-Th(1)-C(5)#1   | 118.733(15) | C(5)#1-Th(1)-C(6)   | 103.09(5) |
| C(1)-Th(1)-C(5)#2   | 96.51(4)    | C(5)#2-Th(1)-C(6)   | 138.02(5) |
| C(4)-Th(1)-C(5)#2   | 123.29(5)   | C(3)#2-Th(1)-C(6)   | 97.19(5)  |
| C(4)#1-Th(1)-C(5)#2 | 98.35(5)    | C(3)#1-Th(1)-C(6)   | 149.76(5) |
| C(4)#2-Th(1)-C(5)#2 | 29.24(5)    | C(3)-Th(1)-C(6)     | 47.24(5)  |
| C(5)-Th(1)-C(5)#2   | 118.732(15) | C(1)-Th(1)-C(6)#1   | 74.01(3)  |
| C(5)#1-Th(1)-C(5)#2 | 118.732(14) | C(4)-Th(1)-C(6)#1   | 125.50(5) |
| C(1)-Th(1)-C(3)#2   | 112.05(4)   | C(4)#1-Th(1)-C(6)#1 | 47.68(5)  |
| C(4)-Th(1)-C(3)#2   | 77.99(5)    | C(4)#2-Th(1)-C(6)#1 | 121.74(5) |
| C(4)#1-Th(1)-C(3)#2 | 119.47(5)   | C(5)-Th(1)-C(6)#1   | 138.02(5) |
| C(4)#2-Th(1)-C(3)#2 | 28.99(5)    | C(5)#1-Th(1)-C(6)#1 | 28.83(5)  |
| C(5)-Th(1)-C(3)#2   | 72.01(5)    | C(5)#2-Th(1)-C(6)#1 | 103.09(5) |
| C(5)#1-Th(1)-C(3)#2 | 148.65(5)   | C(3)#2-Th(1)-C(6)#1 | 149.76(5) |
| C(5)#2-Th(1)-C(3)#2 | 47.71(5)    | C(3)#1-Th(1)-C(6)#1 | 47.24(5)  |
| C(1)-Th(1)-C(3)#1   | 112.05(4)   | C(3)-Th(1)-C(6)#1   | 97.19(5)  |
| C(4)-Th(1)-C(3)#1   | 119.47(5)   | C(6)-Th(1)-C(6)#1   | 112.72(3) |
| C(4)#1-Th(1)-C(3)#1 | 28.99(5)    | C(1)-Th(1)-C(6)#2   | 74.01(3)  |
| C(4)#2-Th(1)-C(3)#1 | 77.99(5)    | C(4)-Th(1)-C(6)#2   | 121.74(5) |
| C(5)-Th(1)-C(3)#1   | 148.65(5)   | C(4)#1-Th(1)-C(6)#2 | 125.50(5) |
| C(5)#1-Th(1)-C(3)#1 | 47.71(5)    | C(4)#2-Th(1)-C(6)#2 | 47.68(5)  |
| C(5)#2-Th(1)-C(3)#1 | 72.01(5)    | C(5)-Th(1)-C(6)#2   | 103.09(5) |
| C(3)#2-Th(1)-C(3)#1 | 106.77(4)   | C(5)#1-Th(1)-C(6)#2 | 138.02(5) |
| C(1)-Th(1)-C(3)     | 112.05(3)   | C(5)#2-Th(1)-C(6)#2 | 28.83(5)  |
| C(4)-Th(1)-C(3)     | 29.00(5)    | C(3)#2-Th(1)-C(6)#2 | 47.24(5)  |

|                     |           |                     |             |
|---------------------|-----------|---------------------|-------------|
| C(3)#1-Th(1)-C(6)#2 | 97.19(5)  | C(6)#1-Th(1)-C(2)#1 | 28.97(5)    |
| C(3)-Th(1)-C(6)#2   | 149.76(5) | C(6)#2-Th(1)-C(2)#1 | 89.92(5)    |
| C(6)-Th(1)-C(6)#2   | 112.72(3) | C(2)-Th(1)-C(2)#1   | 118.584(14) |
| C(6)#1-Th(1)-C(6)#2 | 112.72(3) | C(7)-Si(1)-C(8)     | 110.61(10)  |
| C(1)-Th(1)-C(2)     | 83.12(3)  | C(7)-Si(1)-C(9)     | 108.85(9)   |
| C(4)-Th(1)-C(2)     | 48.18(5)  | C(8)-Si(1)-C(9)     | 107.00(9)   |
| C(4)#1-Th(1)-C(2)   | 93.34(5)  | C(7)-Si(1)-C(2)     | 107.27(8)   |
| C(4)#2-Th(1)-C(2)   | 142.86(5) | C(8)-Si(1)-C(2)     | 106.69(8)   |
| C(5)-Th(1)-C(2)     | 48.11(5)  | C(9)-Si(1)-C(2)     | 116.40(8)   |
| C(5)#1-Th(1)-C(2)   | 74.72(5)  | C(3)-C(2)-C(6)      | 105.53(14)  |
| C(5)#2-Th(1)-C(2)   | 166.40(5) | C(3)-C(2)-Si(1)     | 126.23(13)  |
| C(3)#2-Th(1)-C(2)   | 119.88(5) | C(6)-C(2)-Si(1)     | 125.83(13)  |
| C(3)#1-Th(1)-C(2)   | 120.79(5) | C(3)-C(2)-Th(1)     | 73.95(9)    |
| C(3)-Th(1)-C(2)     | 28.94(5)  | C(6)-C(2)-Th(1)     | 74.33(9)    |
| C(6)-Th(1)-C(2)     | 28.97(5)  | Si(1)-C(2)-Th(1)    | 130.42(7)   |
| C(6)#1-Th(1)-C(2)   | 89.92(5)  | C(4)-C(3)-C(2)      | 109.44(15)  |
| C(6)#2-Th(1)-C(2)   | 141.01(5) | C(4)-C(3)-Th(1)     | 73.99(9)    |
| C(1)-Th(1)-C(2)#1   | 83.12(3)  | C(2)-C(3)-Th(1)     | 77.11(9)    |
| C(4)-Th(1)-C(2)#1   | 142.86(5) | C(3)-C(4)-C(5)      | 107.84(15)  |
| C(4)#1-Th(1)-C(2)#1 | 48.18(5)  | C(3)-C(4)-Th(1)     | 77.02(9)    |
| C(4)#2-Th(1)-C(2)#1 | 93.34(5)  | C(5)-C(4)-Th(1)     | 76.00(9)    |
| C(5)-Th(1)-C(2)#1   | 166.40(5) | C(6)-C(5)-C(4)      | 107.69(15)  |
| C(5)#1-Th(1)-C(2)#1 | 48.11(5)  | C(6)-C(5)-Th(1)     | 76.88(9)    |
| C(5)#2-Th(1)-C(2)#1 | 74.72(5)  | C(4)-C(5)-Th(1)     | 74.76(9)    |
| C(3)#2-Th(1)-C(2)#1 | 120.79(5) | C(5)-C(6)-C(2)      | 109.49(15)  |
| C(3)#1-Th(1)-C(2)#1 | 28.94(5)  | C(5)-C(6)-Th(1)     | 74.29(9)    |
| C(3)-Th(1)-C(2)#1   | 119.88(5) | C(2)-C(6)-Th(1)     | 76.70(9)    |
| C(6)-Th(1)-C(2)#1   | 141.01(5) |                     |             |

---

Symmetry transformations used to generate equivalent atoms:

#1 -y+1,x-y,z #2 -x+y+1,-x+1,z

### **X-ray Data Collection, Structure Solution and Refinement for $(\text{Cp}'_3\text{Th})_2(\mu\text{-O})$**

A colorless crystal of approximate dimensions 0.112 x 0.205 x 0.329 mm was mounted in a cryoloop and transferred to a Bruker SMART APEX II diffractometer. The APEX2<sup>2</sup> program package was used to determine the unit-cell parameters and for data collection (15 sec/frame scan time for a sphere of diffraction data). The raw frame data was processed using SAINT<sup>3</sup> and SADABS<sup>4</sup> to yield the reflection data file. Subsequent calculations were carried out using the SHELXTL<sup>5</sup> program. The diffraction symmetry was  $2/m$  and the systematic absences were consistent with the monoclinic space group  $P2_1/c$  that was later determined to be correct.

The structure was solved by dual space methods and refined on  $F^2$  by full-matrix least-squares techniques. The analytical scattering factors<sup>6</sup> for neutral atoms were used throughout the analysis. Hydrogen atoms were located from a difference-Fourier map and refined ( $x, y, z$  and  $U_{\text{iso}}$ ). The molecule was located on an inversion center.

Least-squares analysis yielded  $wR2 = 0.0331$  and  $\text{Goof} = 1.037$  for 415 variables refined against 6849 data ( $0.73 \text{ \AA}$ ),  $R1 = 0.0162$  for those 6208 data with  $I > 2.0\sigma(I)$ .

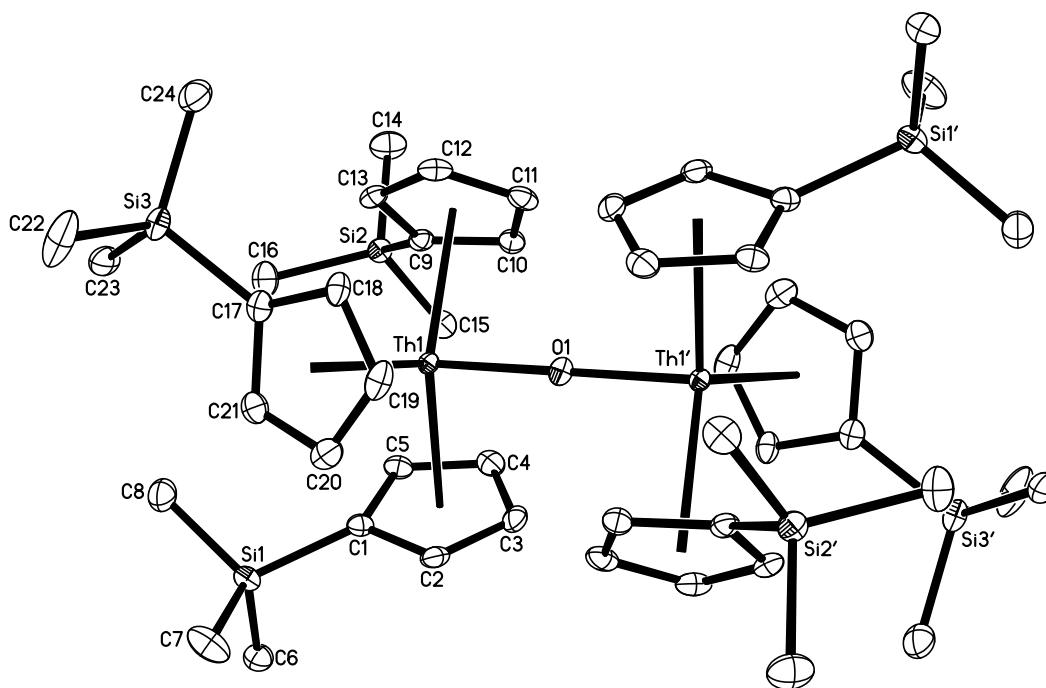

**Fig. S5.** OTREP representation of  $(\text{Cp}'_3\text{Th})_2(\mu\text{-O})$  with thermal ellipsoids drawn at the 50% probability level. Hydrogen atoms are omitted for clarity.

**Table S5.** Crystal data and structure refinement for  $(\text{Cp}'_3\text{Th})_2(\mu\text{-O})$ .

|                      |                                                                |                               |
|----------------------|----------------------------------------------------------------|-------------------------------|
| Identification code  | jcw5 (Justin Wedal)                                            |                               |
| Empirical formula    | $\text{C}_{48} \text{H}_{78} \text{O} \text{Si}_6 \text{Th}_2$ |                               |
| Formula weight       | 1303.72                                                        |                               |
| Temperature          | 88(2) K                                                        |                               |
| Wavelength           | 0.71073 Å                                                      |                               |
| Crystal system       | Monoclinic                                                     |                               |
| Space group          | $P2_1/c$                                                       |                               |
| Unit cell dimensions | $a = 9.5444(6)$ Å                                              | $\alpha = 90^\circ$ .         |
|                      | $b = 18.4598(11)$ Å                                            | $\beta = 103.9575(7)^\circ$ . |
|                      | $c = 15.7099(10)$ Å                                            | $\gamma = 90^\circ$ .         |
| Volume               | $2686.2(3)$ Å <sup>3</sup>                                     |                               |
| Z                    | 2                                                              |                               |

|                                         |                                                               |
|-----------------------------------------|---------------------------------------------------------------|
| Density (calculated)                    | 1.612 Mg/m <sup>3</sup>                                       |
| Absorption coefficient                  | 5.695 mm <sup>-1</sup>                                        |
| F(000)                                  | 1276                                                          |
| Crystal color                           | colorless                                                     |
| Crystal size                            | 0.329 x 0.205 x 0.112 mm <sup>3</sup>                         |
| Theta range for data collection         | 1.732 to 29.155°                                              |
| Index ranges                            | -13 ≤ <i>h</i> ≤ 12, -24 ≤ <i>k</i> ≤ 23, -20 ≤ <i>l</i> ≤ 20 |
| Reflections collected                   | 32844                                                         |
| Independent reflections                 | 6849 [R(int) = 0.0256]                                        |
| Completeness to theta = 25.500°         | 100.0 %                                                       |
| Absorption correction                   | Semi-empirical from equivalents                               |
| Max. and min. transmission              | 0.4319 and 0.3096                                             |
| Refinement method                       | Full-matrix least-squares on F <sup>2</sup>                   |
| Data / restraints / parameters          | 6849 / 0 / 415                                                |
| Goodness-of-fit on F <sup>2</sup>       | 1.037                                                         |
| Final R indices [I > 2σ(I) = 6208 data] | R1 = 0.0162, wR2 = 0.0320                                     |
| R indices (all data, 0.73 Å)            | R1 = 0.0201, wR2 = 0.0331                                     |
| Largest diff. peak and hole             | 0.565 and -0.498 e.Å <sup>-3</sup>                            |

**Table S6.** Bond lengths [Å] and angles [°] for (Cp'<sub>3</sub>Th)<sub>2</sub>(μ-O).

|             |             |             |            |
|-------------|-------------|-------------|------------|
| Th(1)-Cnt1  | 2.594       | Th(1)-C(2)  | 2.8865(19) |
| Th(1)-Cnt2  | 2.595       | Th(1)-C(17) | 2.9034(19) |
| Th(1)-Cnt3  | 2.587       | Th(1)-C(9)  | 2.9217(19) |
| Th(1)-O(1)  | 2.14604(12) | Th(1)-C(1)  | 2.9229(18) |
| Th(1)-C(4)  | 2.803(2)    | Si(1)-C(7)  | 1.863(2)   |
| Th(1)-C(20) | 2.8053(19)  | Si(1)-C(6)  | 1.866(2)   |
| Th(1)-C(12) | 2.809(2)    | Si(1)-C(1)  | 1.867(2)   |
| Th(1)-C(21) | 2.8386(19)  | Si(1)-C(8)  | 1.867(2)   |
| Th(1)-C(19) | 2.8401(19)  | Si(2)-C(9)  | 1.861(2)   |
| Th(1)-C(11) | 2.841(2)    | Si(2)-C(14) | 1.864(2)   |
| Th(1)-C(3)  | 2.842(2)    | Si(2)-C(16) | 1.866(2)   |
| Th(1)-C(5)  | 2.8419(19)  | Si(2)-C(15) | 1.872(2)   |
| Th(1)-C(13) | 2.8453(19)  | Si(3)-C(24) | 1.861(2)   |
| Th(1)-C(18) | 2.8752(19)  | Si(3)-C(23) | 1.863(2)   |
| Th(1)-C(10) | 2.884(2)    | Si(3)-C(22) | 1.867(3)   |

|                   |             |                   |           |
|-------------------|-------------|-------------------|-----------|
| Si(3)-C(17)       | 1.869(2)    | C(20)-Th(1)-C(19) | 28.81(6)  |
| O(1)-Th(1)#1      | 2.14611(12) | C(12)-Th(1)-C(19) | 97.62(6)  |
| C(1)-C(5)         | 1.422(3)    | C(21)-Th(1)-C(19) | 47.13(6)  |
| C(1)-C(2)         | 1.428(3)    | O(1)-Th(1)-C(11)  | 73.80(4)  |
| C(2)-C(3)         | 1.403(3)    | C(4)-Th(1)-C(11)  | 98.59(6)  |
| C(3)-C(4)         | 1.406(3)    | C(20)-Th(1)-C(11) | 139.89(6) |
| C(4)-C(5)         | 1.415(3)    | C(12)-Th(1)-C(11) | 28.83(6)  |
| C(9)-C(13)        | 1.424(3)    | C(21)-Th(1)-C(11) | 133.89(6) |
| C(9)-C(10)        | 1.429(3)    | C(19)-Th(1)-C(11) | 111.97(6) |
| C(10)-C(11)       | 1.401(3)    | O(1)-Th(1)-C(3)   | 75.23(4)  |
| C(11)-C(12)       | 1.407(3)    | C(4)-Th(1)-C(3)   | 28.83(6)  |
| C(12)-C(13)       | 1.410(3)    | C(20)-Th(1)-C(3)  | 97.73(6)  |
| C(17)-C(21)       | 1.423(3)    | C(12)-Th(1)-C(3)  | 141.47(6) |
| C(17)-C(18)       | 1.425(3)    | C(21)-Th(1)-C(3)  | 112.25(6) |
| C(18)-C(19)       | 1.403(3)    | C(19)-Th(1)-C(3)  | 113.11(6) |
| C(19)-C(20)       | 1.405(3)    | C(11)-Th(1)-C(3)  | 113.86(6) |
| C(20)-C(21)       | 1.409(3)    | O(1)-Th(1)-C(5)   | 120.67(4) |
|                   |             | C(4)-Th(1)-C(5)   | 29.02(6)  |
| Cnt1-Th(1)-O(1)   | 100.1       | C(20)-Th(1)-C(5)  | 106.21(6) |
| Cnt2-Th(1)-O(1)   | 98.6        | C(12)-Th(1)-C(5)  | 121.90(6) |
| Cnt3-Th(1)-O(1)   | 98.8        | C(21)-Th(1)-C(5)  | 97.37(6)  |
| Cnt1-Th(1)-Cnt2   | 117.4       | C(19)-Th(1)-C(5)  | 134.71(6) |
| Cnt1-Th(1)-Cnt3   | 117.5       | C(11)-Th(1)-C(5)  | 113.30(6) |
| Cnt2-Th(1)-Cnt3   | 117.6       | C(3)-Th(1)-C(5)   | 47.12(6)  |
| O(1)-Th(1)-C(4)   | 93.17(4)    | O(1)-Th(1)-C(13)  | 119.58(4) |
| O(1)-Th(1)-C(20)  | 92.25(4)    | C(4)-Th(1)-C(13)  | 105.04(6) |
| C(4)-Th(1)-C(20)  | 119.96(6)   | C(20)-Th(1)-C(13) | 123.05(6) |
| O(1)-Th(1)-C(12)  | 92.62(4)    | C(12)-Th(1)-C(13) | 28.86(6)  |
| C(4)-Th(1)-C(12)  | 119.88(6)   | C(21)-Th(1)-C(13) | 98.05(6)  |
| C(20)-Th(1)-C(12) | 119.50(6)   | C(19)-Th(1)-C(13) | 113.28(6) |
| O(1)-Th(1)-C(21)  | 119.51(4)   | C(11)-Th(1)-C(13) | 47.05(6)  |
| C(4)-Th(1)-C(21)  | 122.32(6)   | C(3)-Th(1)-C(13)  | 133.58(6) |
| C(20)-Th(1)-C(21) | 28.91(6)    | C(5)-Th(1)-C(13)  | 96.44(6)  |
| C(12)-Th(1)-C(21) | 105.60(6)   | O(1)-Th(1)-C(18)  | 88.77(4)  |
| O(1)-Th(1)-C(19)  | 73.92(4)    | C(4)-Th(1)-C(18)  | 167.12(6) |
| C(4)-Th(1)-C(19)  | 141.11(6)   | C(20)-Th(1)-C(18) | 47.19(6)  |



|                   |           |                   |           |
|-------------------|-----------|-------------------|-----------|
| C(12)-Th(1)-C(18) | 72.69(6)  | C(11)-Th(1)-C(17) | 105.23(6) |
| C(21)-Th(1)-C(18) | 46.81(6)  | C(3)-Th(1)-C(17)  | 140.90(6) |
| C(19)-Th(1)-C(18) | 28.40(6)  | C(5)-Th(1)-C(17)  | 116.83(6) |
| C(11)-Th(1)-C(18) | 94.18(6)  | C(13)-Th(1)-C(17) | 75.37(6)  |
| C(3)-Th(1)-C(18)  | 141.38(6) | C(18)-Th(1)-C(17) | 28.55(5)  |
| C(5)-Th(1)-C(18)  | 143.62(6) | C(10)-Th(1)-C(17) | 120.80(6) |
| C(13)-Th(1)-C(18) | 84.92(6)  | C(2)-Th(1)-C(17)  | 112.64(6) |
| O(1)-Th(1)-C(10)  | 88.15(4)  | O(1)-Th(1)-C(9)   | 116.39(4) |
| C(4)-Th(1)-C(10)  | 73.38(6)  | C(4)-Th(1)-C(9)   | 77.01(6)  |
| C(20)-Th(1)-C(10) | 166.58(6) | C(20)-Th(1)-C(9)  | 146.88(6) |
| C(12)-Th(1)-C(10) | 47.09(6)  | C(12)-Th(1)-C(9)  | 47.62(6)  |
| C(21)-Th(1)-C(10) | 144.43(6) | C(21)-Th(1)-C(9)  | 118.27(6) |
| C(19)-Th(1)-C(10) | 140.24(6) | C(19)-Th(1)-C(9)  | 141.72(6) |
| C(11)-Th(1)-C(10) | 28.32(6)  | C(11)-Th(1)-C(9)  | 47.22(5)  |
| C(3)-Th(1)-C(10)  | 95.35(6)  | C(3)-Th(1)-C(9)   | 105.15(6) |
| C(5)-Th(1)-C(10)  | 84.98(6)  | C(5)-Th(1)-C(9)   | 74.42(6)  |
| C(13)-Th(1)-C(10) | 46.62(6)  | C(13)-Th(1)-C(9)  | 28.55(5)  |
| C(18)-Th(1)-C(10) | 119.43(6) | C(18)-Th(1)-C(9)  | 113.44(6) |
| O(1)-Th(1)-C(2)   | 90.26(4)  | C(10)-Th(1)-C(9)  | 28.48(5)  |
| C(4)-Th(1)-C(2)   | 47.14(6)  | C(2)-Th(1)-C(9)   | 120.04(6) |
| C(20)-Th(1)-C(2)  | 73.11(6)  | C(17)-Th(1)-C(9)  | 101.47(5) |
| C(12)-Th(1)-C(2)  | 166.89(6) | O(1)-Th(1)-C(1)   | 118.39(4) |
| C(21)-Th(1)-C(2)  | 83.96(6)  | C(4)-Th(1)-C(1)   | 47.71(6)  |
| C(19)-Th(1)-C(2)  | 95.46(6)  | C(20)-Th(1)-C(1)  | 78.02(6)  |
| C(11)-Th(1)-C(2)  | 142.08(6) | C(12)-Th(1)-C(1)  | 144.83(6) |
| C(3)-Th(1)-C(2)   | 28.34(6)  | C(21)-Th(1)-C(1)  | 74.63(6)  |
| C(5)-Th(1)-C(2)   | 46.61(6)  | C(19)-Th(1)-C(1)  | 106.25(6) |
| C(13)-Th(1)-C(2)  | 142.60(6) | C(11)-Th(1)-C(1)  | 141.79(6) |
| C(18)-Th(1)-C(2)  | 120.18(6) | C(3)-Th(1)-C(1)   | 47.23(6)  |
| C(10)-Th(1)-C(2)  | 120.31(6) | C(5)-Th(1)-C(1)   | 28.51(5)  |
| O(1)-Th(1)-C(17)  | 116.99(4) | C(13)-Th(1)-C(1)  | 116.11(6) |
| C(4)-Th(1)-C(17)  | 145.58(6) | C(18)-Th(1)-C(1)  | 120.70(5) |
| C(20)-Th(1)-C(17) | 47.71(6)  | C(10)-Th(1)-C(1)  | 113.48(5) |
| C(12)-Th(1)-C(17) | 77.28(6)  | C(2)-Th(1)-C(1)   | 28.46(5)  |
| C(21)-Th(1)-C(17) | 28.68(6)  | C(17)-Th(1)-C(1)  | 100.30(5) |
| C(19)-Th(1)-C(17) | 47.29(6)  | C(9)-Th(1)-C(1)   | 100.29(5) |

|                    |            |                   |            |
|--------------------|------------|-------------------|------------|
| C(7)-Si(1)-C(6)    | 108.11(12) | C(1)-C(5)-Th(1)   | 78.91(11)  |
| C(7)-Si(1)-C(1)    | 110.96(11) | C(13)-C(9)-C(10)  | 105.31(17) |
| C(6)-Si(1)-C(1)    | 107.35(10) | C(13)-C(9)-Si(2)  | 123.93(15) |
| C(7)-Si(1)-C(8)    | 111.51(13) | C(10)-C(9)-Si(2)  | 127.21(15) |
| C(6)-Si(1)-C(8)    | 107.16(11) | C(13)-C(9)-Th(1)  | 72.75(11)  |
| C(1)-Si(1)-C(8)    | 111.52(10) | C(10)-C(9)-Th(1)  | 74.31(11)  |
| C(9)-Si(2)-C(14)   | 106.84(10) | Si(2)-C(9)-Th(1)  | 134.29(9)  |
| C(9)-Si(2)-C(16)   | 110.40(10) | C(11)-C(10)-C(9)  | 109.37(18) |
| C(14)-Si(2)-C(16)  | 106.99(12) | C(11)-C(10)-Th(1) | 74.13(11)  |
| C(9)-Si(2)-C(15)   | 112.55(10) | C(9)-C(10)-Th(1)  | 77.22(11)  |
| C(14)-Si(2)-C(15)  | 108.42(11) | C(10)-C(11)-C(12) | 108.26(18) |
| C(16)-Si(2)-C(15)  | 111.36(11) | C(10)-C(11)-Th(1) | 77.55(11)  |
| C(24)-Si(3)-C(23)  | 111.69(11) | C(12)-C(11)-Th(1) | 74.33(11)  |
| C(24)-Si(3)-C(22)  | 108.81(14) | C(11)-C(12)-C(13) | 107.39(18) |
| C(23)-Si(3)-C(22)  | 107.38(13) | C(11)-C(12)-Th(1) | 76.84(12)  |
| C(24)-Si(3)-C(17)  | 112.43(10) | C(13)-C(12)-Th(1) | 76.98(11)  |
| C(23)-Si(3)-C(17)  | 110.92(10) | C(12)-C(13)-C(9)  | 109.65(18) |
| C(22)-Si(3)-C(17)  | 105.26(11) | C(12)-C(13)-Th(1) | 74.16(11)  |
| Th(1)-O(1)-Th(1)#1 | 180.0      | C(9)-C(13)-Th(1)  | 78.70(11)  |
| C(5)-C(1)-C(2)     | 105.39(17) | C(21)-C(17)-C(18) | 105.66(18) |
| C(5)-C(1)-Si(1)    | 124.30(15) | C(21)-C(17)-Si(3) | 123.43(15) |
| C(2)-C(1)-Si(1)    | 127.08(15) | C(18)-C(17)-Si(3) | 127.02(15) |
| C(5)-C(1)-Th(1)    | 72.58(10)  | C(21)-C(17)-Th(1) | 73.13(11)  |
| C(2)-C(1)-Th(1)    | 74.36(11)  | C(18)-C(17)-Th(1) | 74.63(11)  |
| Si(1)-C(1)-Th(1)   | 133.66(9)  | Si(3)-C(17)-Th(1) | 134.58(9)  |
| C(3)-C(2)-C(1)     | 109.39(18) | C(19)-C(18)-C(17) | 109.17(18) |
| C(3)-C(2)-Th(1)    | 74.05(11)  | C(19)-C(18)-Th(1) | 74.41(11)  |
| C(1)-C(2)-Th(1)    | 77.19(11)  | C(17)-C(18)-Th(1) | 76.82(11)  |
| C(2)-C(3)-C(4)     | 108.28(18) | C(18)-C(19)-C(20) | 108.25(18) |
| C(2)-C(3)-Th(1)    | 77.61(11)  | C(18)-C(19)-Th(1) | 77.19(11)  |
| C(4)-C(3)-Th(1)    | 74.05(11)  | C(20)-C(19)-Th(1) | 74.22(11)  |
| C(3)-C(4)-C(5)     | 107.31(18) | C(19)-C(20)-C(21) | 107.58(18) |
| C(3)-C(4)-Th(1)    | 77.12(11)  | C(19)-C(20)-Th(1) | 76.97(11)  |
| C(5)-C(4)-Th(1)    | 77.02(11)  | C(21)-C(20)-Th(1) | 76.86(11)  |
| C(4)-C(5)-C(1)     | 109.62(18) | C(20)-C(21)-C(17) | 109.32(18) |
| C(4)-C(5)-Th(1)    | 73.96(11)  | C(20)-C(21)-Th(1) | 74.24(11)  |

C(17)-C(21)-Th(1)            78.19(11)

---

Symmetry transformations used to generate equivalent atoms:

#1 -x+1,-y+1,-z+1

### Computational Details

Density functional theory (DFT) using the TPSSh<sup>8</sup> functional with Grimme's D3 dispersion correction<sup>9</sup> was employed to study Cp'<sub>3</sub>ThBr, (Cp'<sub>3</sub>ThBr)<sup>1-</sup> and Cp'<sub>3</sub>Th species. Scalar relativistic effective core potentials (ECPs)<sup>10</sup> with the def-TZVP<sup>11</sup> basis set was used for the thorium and polarized split-valence basis sets with diffuse functions def2-SVPD<sup>12</sup> was used for the other atoms. A grid size of m4 was used. Solvent effects were accounted for using the continuum solvent model (COSMO)<sup>13</sup> with a dielectric constant of THF ( $\epsilon = 7.52$ ). All structures were computed in the C1 symmetry with geometry convergence of 10<sup>-5</sup> a.u and energy convergence of 10<sup>-7</sup> a.u. Vibrational frequencies were computed for all the optimized structures and were confirmed to be ground state structures with the absence of imaginary frequencies. Free energies and equilibrium constants at 298.15 K were obtained within the rigid rotor-harmonic oscillator approximation. All calculations were carried out with the TURBOMOLE v.7.2.1 molecular package.<sup>14</sup>

The solvent optimized structure of Cp'<sub>3</sub>Th shows a 6dz<sup>2</sup>-like HOMO orbital in Figure S4 consistent with previous calculations on Cp''<sub>3</sub>Th.<sup>15</sup> For comparison, Cp'<sub>3</sub>Th was also optimized with def2-SV(P) basis set<sup>12</sup> for the lighter atoms. The average Th-Cp ring centroid distance was shortened by 0.04 Å for Cp'<sub>3</sub>Th. The HOMO of (Cp'<sub>3</sub>ThBr)<sup>1-</sup> shows 55% 4f-contribution and 45% 6d-contribution while the HOMO of Cp'<sub>3</sub>ThBr shows little to no 6d-contribution, Figure S5.

Time dependent density functional theory (TDDFT) calculations were carried out on the solvent-optimized structures of Cp'<sub>3</sub>ThBr, (Cp'<sub>3</sub>ThBr)<sup>1-</sup>, and Cp'<sub>3</sub>Th using the same functional

and basis sets. TDDFT calculations of the 30 lowest excitations from the spin unrestricted excitations were computed to simulate their UV-Vis spectra, Figure S6. To account for the systematic underestimation of excitation energies by semi-local density functionals such as TPSSH<sup>16</sup>, the simulated excitation spectrum was blue-shifted by 0.4 eV. Normalized Gaussian line profiles with a root mean square width of 0.12 eV were centered at the thus obtained excitation energies, scaled by the computed oscillator strength, and superimposed to simulate the experimental absorption spectra. Some notable excitations (in nm) and oscillator strengths in the length gauge (in a.u.) from each band, and dominant single-particle contributions for each transition, are reported in Table S7.

Electronic transitions were analyzed with VMD<sup>17</sup> and Mulliken population analysis (MPA). Excitations between 400 and 1000 nm are largely metal-metal transitions with d-f character for the Cp'<sub>3</sub>Th complex. Transitions below 400 nm are mostly d-p and some f-f transitions. Excitations in (Cp'<sub>3</sub>ThBr)<sup>1-</sup> are mostly f-f between 400 and 1000 nm and f-d below 350 nm. Excitations in Cp'<sub>3</sub>ThBr are largely f-f transitions below 400 nm.

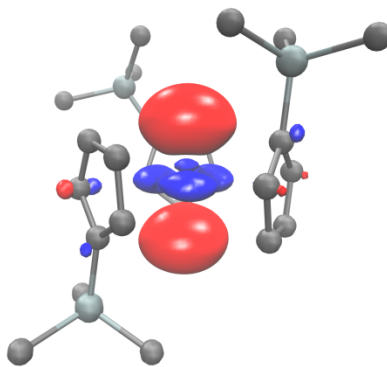

**Fig. S6.** Calculated  $dz^2$ -like HOMO of Cp'<sub>3</sub>Th plotted with a contour value of 0.06.

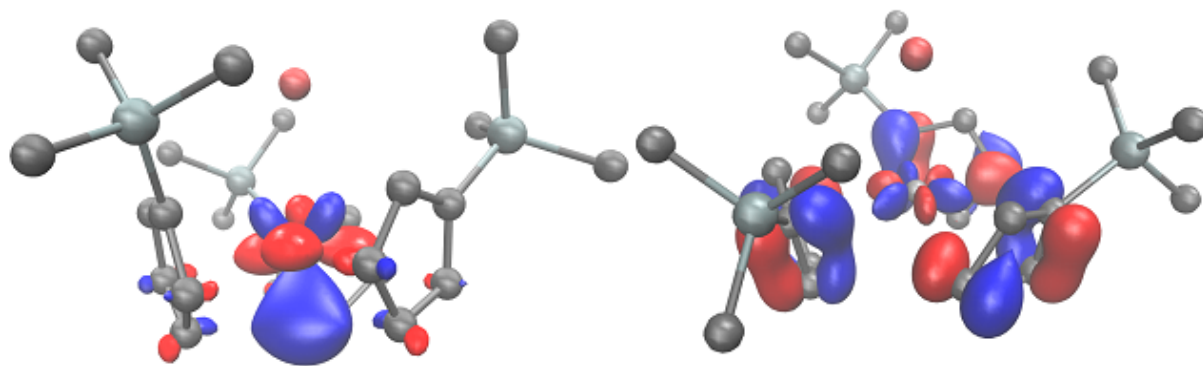

**Fig. S7.** Calculated d-f like HOMO of  $(\text{Cp}'_3\text{ThBr})^{1-}$  (left) and f-like HOMO of  $\text{Cp}'_3\text{ThBr}$  (right) plotted with contour values of 0.06.

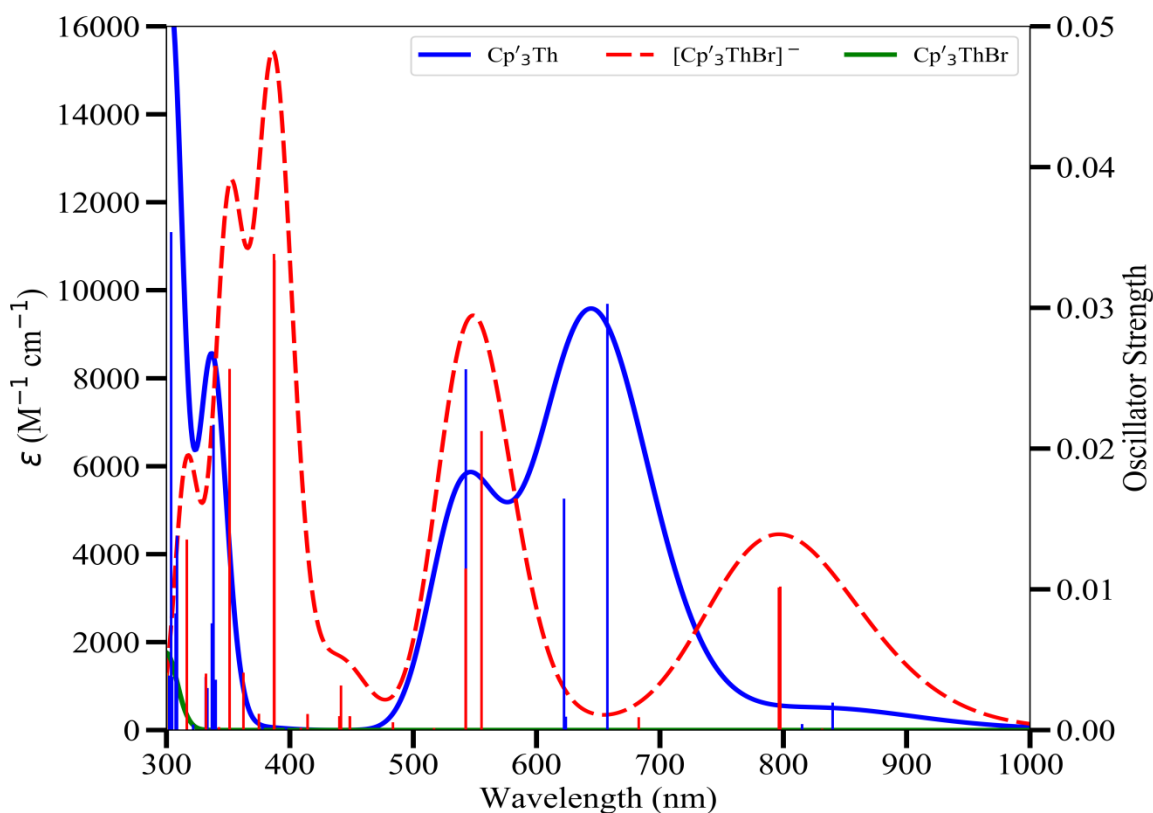

**Fig. S8.** Calculated UV-visible spectra of  $\text{Cp}'_3\text{Th}$  (solid blue),  $(\text{Cp}'_3\text{ThBr})^{1-}$  (dotted red), and  $\text{Cp}'_3\text{ThBr}$  (solid green) with computed TDDFT oscillator strengths shown as vertical lines. The

computed excitation energies were empirically blue-shifted by 0.04 eV and a gaussian line broadening of 0.12 eV were applied.

**Table S7.** Electronic excitation summary of  $\text{Cp}'_3\text{Th}$ ,  $(\text{Cp}'_3\text{ThBr})^{1-}$  and  $\text{Cp}'_3\text{ThBr}$  computed using TPSSh functional, def-TZVP/ECPs basis set for thorium and def2-SVPD basis set for lighter atoms. Oscillator strength is reported in the length gauge. The 128a and 146a orbitals are the singly occupied HOMO for  $\text{Cp}'_3\text{Th}$  and  $(\text{Cp}'_3\text{ThBr})^{1-}$ , respectively, and 145a is the doubly occupied HOMO for  $\text{Cp}'_3\text{ThBr}$ .

|                                                    | Wavelength<br>(nm) | Oscillator<br>Strength<br>(len) | Dominant Contributions |         |          | Transition  |
|----------------------------------------------------|--------------------|---------------------------------|------------------------|---------|----------|-------------|
|                                                    |                    |                                 | occupied               | virtual | % weight |             |
| <b><math>\text{Cp}'_3\text{Th}</math></b>          | 1152               | 0.002                           | 128a                   | 129a    | 98.8     | 6d-5f       |
|                                                    | 1106               | 0.001                           | 128a                   | 130a    | 99.1     | 6d-5f       |
|                                                    | 834.1              | 0.031                           | 128a                   | 131a    | 95.2     | 6d-5f       |
|                                                    | 778.4              | 0.016                           | 128a                   | 133a    | 96.5     | 6d-5f       |
|                                                    | 657.9              | 0.026                           | 128a                   | 134a    | 96.1     | 6d-5f       |
|                                                    | 381.7              | 0.003                           | 128a                   | 140a    | 65.1     | 6d-5f       |
|                                                    |                    |                                 | 128a                   | 137a    | 10.7     | 6d-7p       |
|                                                    |                    |                                 | 128a                   | 138a    | 55       | 6d-7p       |
|                                                    | 379.6              | 0.022                           | 128a                   | 139a    | 18.9     | 6d-7p       |
|                                                    |                    |                                 | 128a                   | 141a    | 11.6     | 6d-6d       |
|                                                    |                    |                                 | 126b                   | 128b    | 67.6     | 4f-7s       |
|                                                    | 336.8              | 0.035                           | 128a                   | 143a    | 7.8      | 6d-5f/6d-6d |
|                                                    |                    |                                 | 126a                   | 130a    | 34.7     | 4f-5f       |
|                                                    | 317.2              | 0.002                           | 126b                   | 130b    | 31.3     | 4f-5f       |
|                                                    |                    |                                 | 127a                   | 131a    | 39.4     | 4f-5f       |
| 303.6                                              | 0.002              | 127b                            | 131b                   | 8.3     | 4f-5f    |             |
|                                                    |                    |                                 |                        |         |          |             |
| <b><math>(\text{Cp}'_3\text{ThBr})^{1-}</math></b> | 1073.8             | 0.01                            | 146a                   | 151a    | 89.1     | 4f-5f       |
|                                                    | 1071.6             | 0.01                            | 146a                   | 152a    | 88.9     | 4f-5f       |
|                                                    | 676.6              | 0.02                            | 146a                   | 153a    | 91.1     | 4f-5f       |
|                                                    | 657.8              | 0.011                           | 146a                   | 154a    | 90.3     | 4f-5f       |
|                                                    | 478.3              | 0.011                           | 146a                   | 160a    | 69.8     | 4f-5f       |

|                            |       |       |      |      |      |       |
|----------------------------|-------|-------|------|------|------|-------|
|                            |       |       | 146a | 165a | 17.9 | 4f-5f |
|                            | 442.7 | 0.033 | 146a | 167a | 66.8 | 4f-5f |
|                            | 442.4 | 0.034 | 146a | 168a | 67   | 4f-5f |
|                            | 396   | 0.026 | 146a | 171a | 70.5 | 4f-5f |
|                            | 352.3 | 0.013 | 146a | 178a | 39.9 | 4f-5f |
|                            |       |       | 146a | 182a | 19.2 | 4f-5f |
|                            |       |       | 146a | 177a | 12.1 | 4f-5f |
|                            |       |       | 146a | 180a | 10.5 | 4f-6d |
| <b>Cp'<sub>3</sub>ThBr</b> | 332   | 0.004 | 145a | 147a | 94.7 | 4f-5f |
|                            | 332   | 0.004 | 145a | 148a | 94.7 | 4f-5f |
|                            | 296   | 0.008 | 144a | 148a | 40.8 | 4f-5f |
|                            |       |       | 143a | 147a | 39.2 | 4f-5f |
|                            | 295.1 | 0.025 | 143a | 147a | 30.6 | 4f-5f |
|                            |       |       | 144a | 148a | 29.8 | 4f-5f |
|                            |       |       | 144a | 147a | 12.9 | 4f-5f |
|                            |       |       | 143a | 148a | 12.5 | 4f-5f |
|                            | 295   | 0.022 | 143a | 148a | 30.8 | 4f-5f |
|                            |       |       | 144a | 147a | 29.5 | 4f-5f |
|                            |       |       | 143a | 147a | 12.8 | 4f-5f |
|                            |       |       | 144a | 148a | 12.6 | 4f-5f |
|                            | 291.6 | 0.016 | 142a | 146a | 90.9 | 6p-5f |
|                            | 284.7 | 0.02  | 145a | 150a | 53.1 | 4f-5f |
|                            |       |       | 142a | 148a | 25.1 | 6p-5f |
|                            | 249.2 | 0.076 | 144a | 151a | 25.4 | 4f-5f |
|                            |       |       | 143a | 150a | 25.4 | 4f-5f |
|                            |       |       | 140a | 148a | 16.1 | 5d-5f |
|                            |       |       | 141a | 147a | 15.9 | 5d-5f |

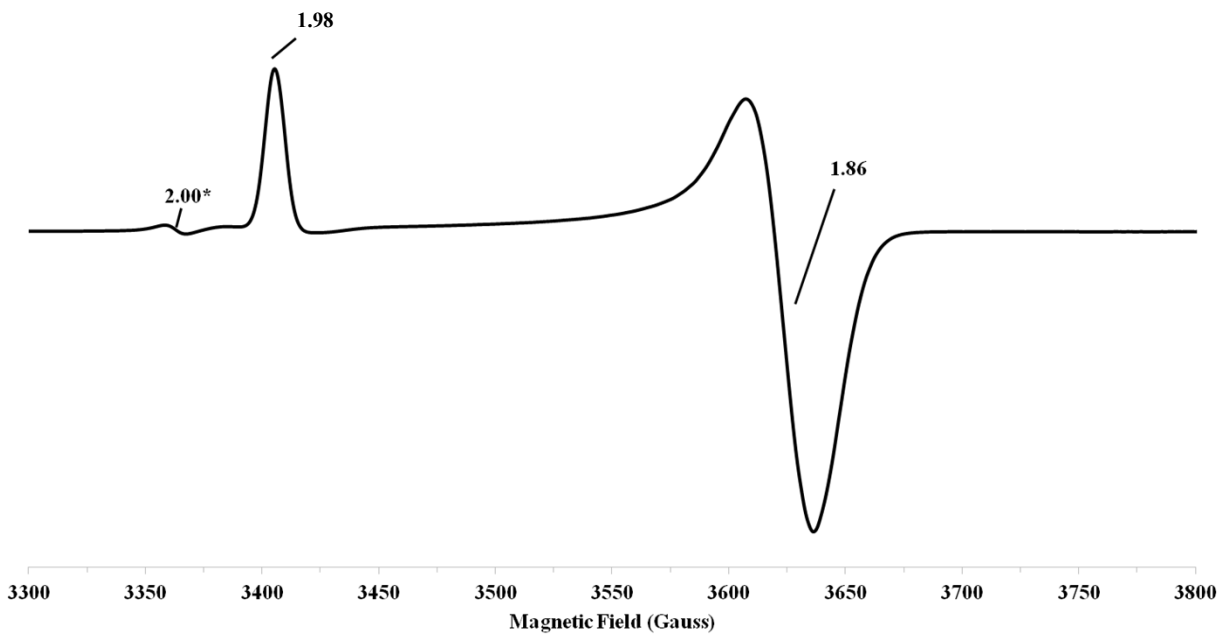

**Fig. S9.** X-band EPR spectrum of  $(C_5Me_4H)_3Th^{18}$  in toluene at 77K (mode: perpendicular,  $\nu = 9.434531$  GHz,  $P = 2.161$ , modulation amplitude = 2 mT). \*The feature at  $g = 2.00$  is attributed to electride.<sup>19</sup>

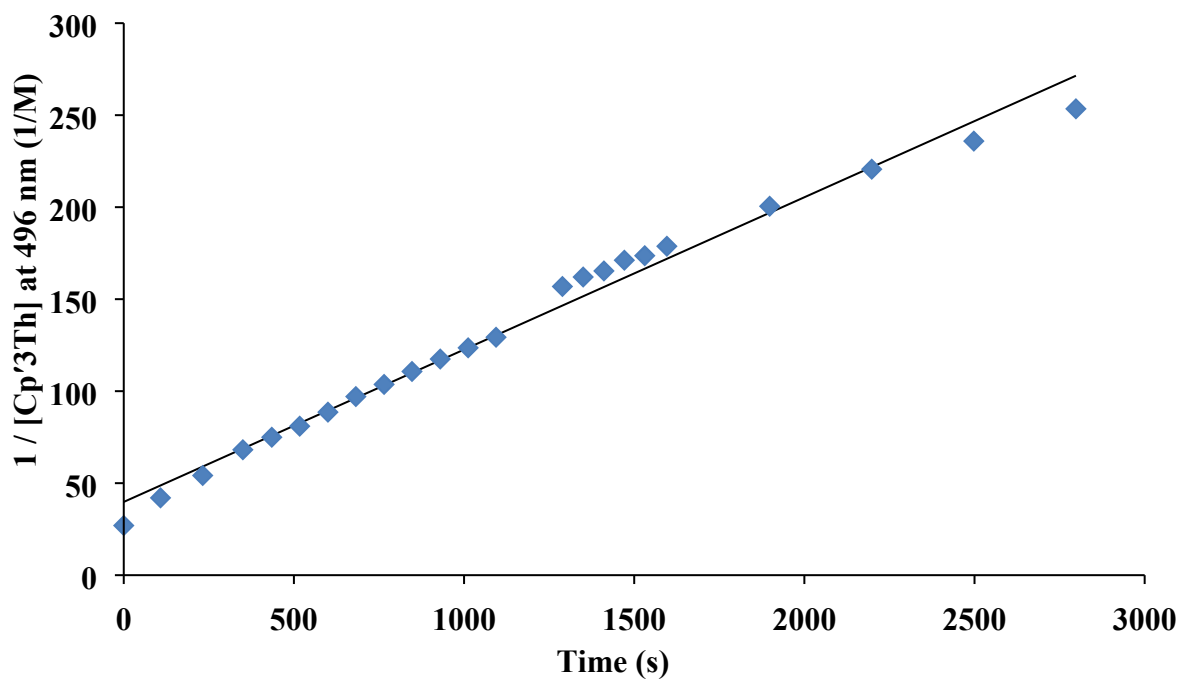

**Fig. S10.** Decomposition of **A** by monitoring absorbance at 496 nm in THF.



### Electrochemical measurements of $\text{Cp}'_3\text{ThCl}$ .

Data were collected using a glassy carbon working electrode, silver wire reference electrode, and platinum wire counter electrode. All data were collected in THF with 0.050 M  $[\text{nBu}_4][\text{BPh}_4]$  as supporting electrolyte and ferrocene in solution as a standard. All scans were run in the negative direction to observe the cathodic wave.

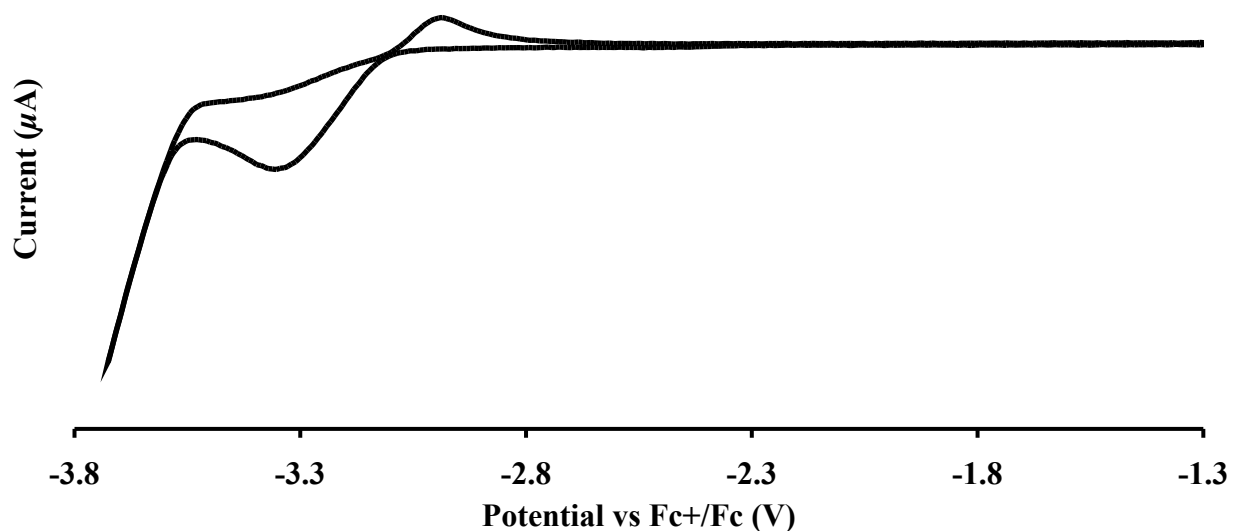

**Fig. S11.** Cyclic voltammogram of  $\text{Cp}'_3\text{ThCl}$  in 0.050 M  $[\text{nBu}_4][\text{BPh}_4]/\text{THF}$  with a scan rate of 200 mV/s. Peak current ratio = 0.205, peak separation = 360 mV.

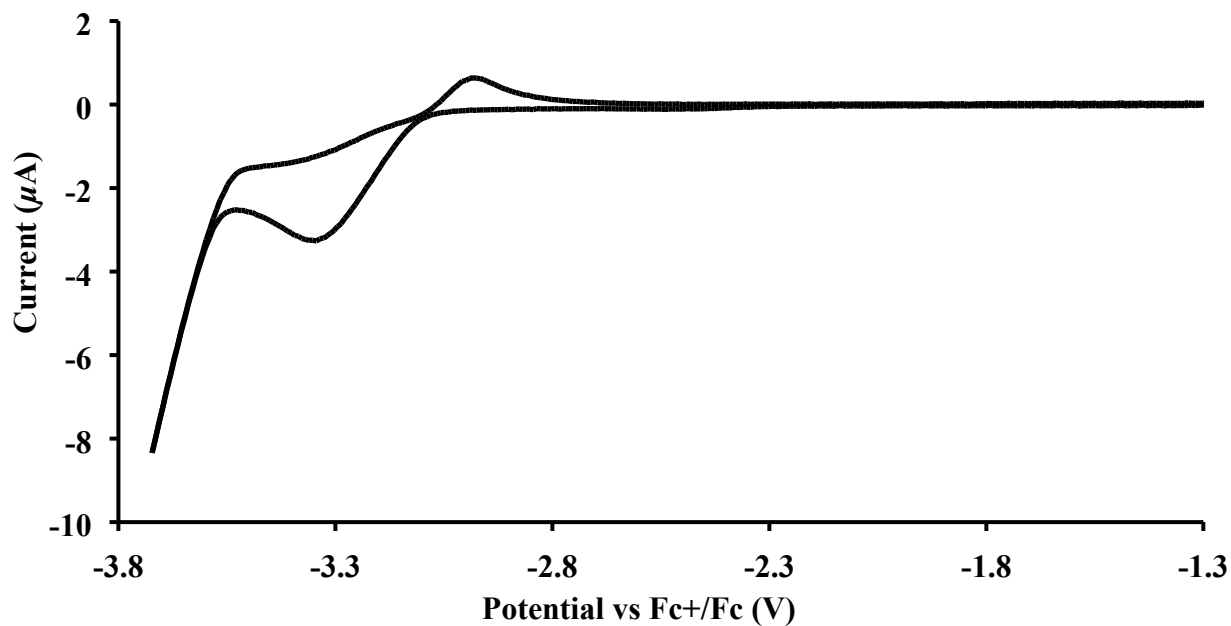

**Fig. S12.** Cyclic voltammogram of  $\text{Cp}'_3\text{ThCl}$  in 0.050 M  $[\text{nBu}_4][\text{BPh}_4]/\text{THF}$  with a scan rate of 500 mV/s. Peak current ratio = 0.195, peak separation = 380 mV.

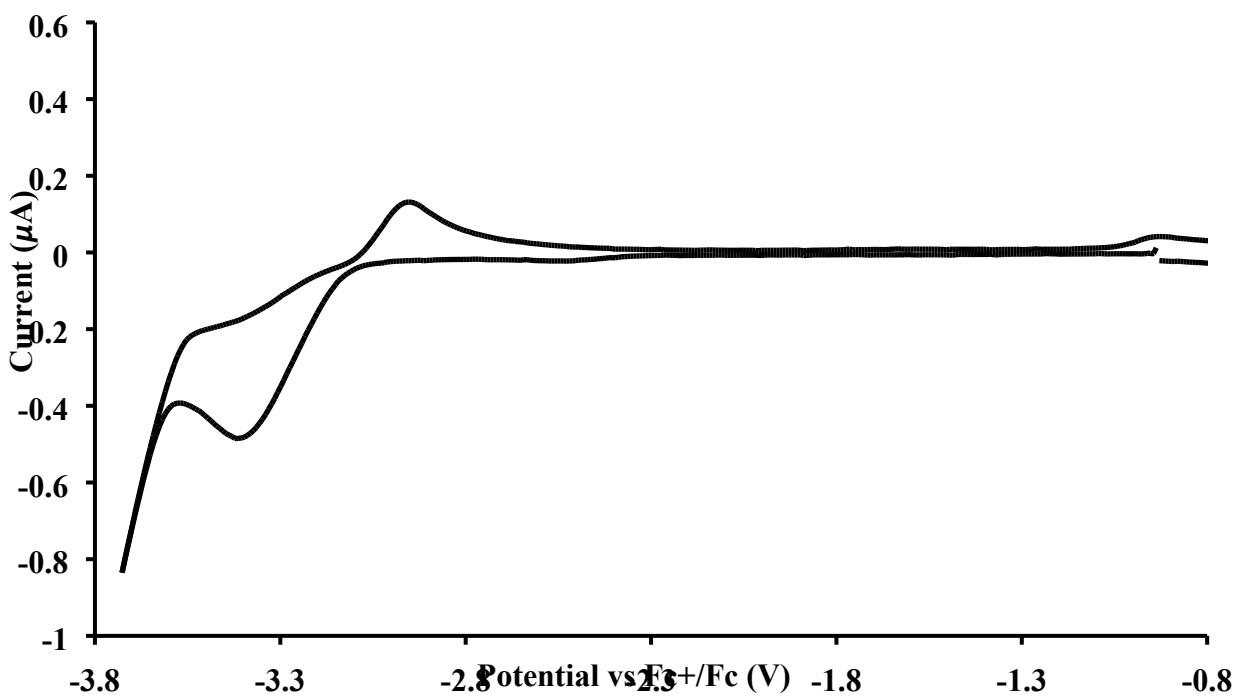

**Fig. S13.** Cyclic voltammogram of  $\text{Cp}'_3\text{ThCl}$  in 0.050 M  $[\text{nBu}_4][\text{BPh}_4]/\text{THF}$  with a scan rate of 1000 mV/s. Peak current ratio = 0.265, peak separation = 440 mV.

## References

1. M. Weydert, J. G. Brennan, R. A. Andersen, and R. G. Bergman. *Organometallics* 1995, **14**, 3942–3951.
2. APEX2 Version 2014.11-0, Bruker AXS, Inc.; Madison, WI 2014.
3. SAINT Version 8.34a, Bruker AXS, Inc.; Madison, WI 2013.
4. Sheldrick, G. M. SADABS, Version 2014/5, Bruker AXS, Inc.; Madison, WI 2014.
5. Sheldrick, G. M. SHELXTL, Version 2014/7, Bruker AXS, Inc.; Madison, WI 2014
6. International Tables for Crystallography 1992, Vol. C., Dordrecht: Kluwer Academic Publishers.
7. (a) A. L. Spek. *Acta Cryst.* 2015, **C71**, 9-19. (b) A. L. Spek. *Acta. Cryst.* 2009, **D65**, 148-155.
8. V. N. Staroverov, G. E. Scuseria, J. Tao, and J. P. Perdew. *J. Chem. Phys.* 2003, **119**, 12129–12137.
9. (a) S. Grimme. *J. Comput. Chem.* 2006, **27**, 1787-1799. (b) S. Grimme, J. Antony, S. Ehrlich, and H. Krieg. *J. Chem. Phys.* 2010, **132**, 154104.
10. W. Küchle, M. Dolg, H. Stoll, and H. Preuss. *J. Chem. Phys.* 1994, **100**, 7535.
11. X. Cao and M. Dolg. *J. Mol. Struct. (Theochem)* 2004, **673**, 203.
12. A. Schäfer, H. Horn, and R. Ahlrichs. *J. Chem. Phys.* 1992, **97**, 2571.
13. A. Klamt and G. J. Schüürmann. *Chem. Soc., Perkin Trans.* 1993, **2**, 799-805.
14. TURBOMOLE V7.2 2017, a development of University of Karlsruhe and Forschungszentrum Karlsruhe GmbH, 1989-2007, TURBOMOLE GmbH, since 2007; available from <http://www.turbomole.com>.

15. R. R. Langeslay, M. E. Fieser, J. W. Ziller, F. Furche, and W. J. Evans. *Chem. Sci.* 2015, **6**, 517–521.
16. R. Send, M. Kühn, and F. Furche. *J. Chem. Theory Comput.*, 2011, **7**, 2376–2386.
17. VMD 1.9, available from <http://www.ks.uiuc.edu/Research/vmd/>.
18. N. A. Siladke, C. L. Webster, J. R. Walensky, M. K. Takase, J. W. Ziller, D. J. Grant, L. Gagliardi, and W. J. Evans. *Organometallics* 2013, **32**, 6522–6531.
19. T. F. Jenkins, D. H. Woen, L. N. Mohanam, J. W. Ziller, F. Furche, and W. J. Evans. *Organometallics* 2018, **37**, 3863–3873.
